# Supplementary material for: Genetic diversity of Poa pratensis L. depending on geographical origin and compared with genetic markers
Source: PeerJ. 2016 Sep 27;4:e2489. doi: 10.7717/peerj.2489 (PMC5045881; doi:10.7717/peerj.2489)
Supplement: Dats S1 — (a) The distribution of amplification products for RAPD and ISSR primers, differing of the studied ecotypes and cultivars of P. pratensis; 1—band, 0—no band (b) The distribution of amplification products for ISSR primers; 1—band, 0—no band (c) The distribution of amplification products for RAPD primers; 1—band, 0—no band (d) Genetic Similarity Index (Si) of the studied populations of P. pratensis for ISSR markers. (e) Genetic Similarity Index (Si) of the studied populations of P. pratensis for RAPD markers. (f) Genetic Similarity Index (Si) of the studied populations of P. pratensis for RAPD and ISSR methods. (g) The number and size of the selected amplification products obtained in the presence of each ISSR primer, was used as the initial data for PCA. [file peerj-04-2489-s001.xls]

## Sheet: 0-1 (RAPD+ISSR)
pom06 175	zap00 240	lbs05 170	lbs05 628	dos01 333	dos01 405	dos01 468	bes03 373	bes03 379	bes03 354	ora03 178	bie04 189	pod02 215	pod02 172	pod02 317	'Alicia'	'Limousine'	'Eska 46'
0	1	0	1	0	0	1	0	0	0	0	0	0	0	0	0	0	0
1	0	1	0	0	0	0	0	0	0	0	0	0	0	0	1	0	0
1	0	0	0	0	0	1	0	0	0	0	0	1	0	0	0	1	0
0	0	0	0	1	0	0	0	0	1	0	0	0	0	0	0	0	0
0	1	0	0	0	0	0	0	0	1	0	0	0	0	0	1	0	0
1	0	1	0	0	0	1	0	1	0	1	0	0	0	0	0	1	0
0	0	0	1	1	0	1	1	1	1	1	0	1	1	1	1	1	1
1	1	0	0	0	1	0	0	0	0	0	0	0	0	0	0	0	0
1	1	1	0	1	0	0	0	0	1	0	0	0	0	0	1	1	0
1	1	1	0	0	0	0	0	0	0	0	1	1	1	1	0	0	1
1	0	0	1	0	1	1	0	0	0	0	0	1	0	1	0	0	0
1	0	0	0	0	0	0	0	0	1	1	0	0	1	0	1	1	0
0	1	0	0	1	0	1	1	1	1	1	1	1	1	1	1	1	1
1	0	0	0	0	1	1	0	0	0	0	1	0	1	0	0	0	0
0	0	0	1	0	0	0	0	0	0	0	0	0	0	1	0	0	0
0	0	0	1	0	0	1	1	1	0	0	0	1	0	1	0	1	0
1	1	0	0	1	1	0	0	0	1	1	1	0	0	0	1	1	0
0	0	1	0	0	0	0	0	0	0	0	0	0	0	0	0	0	0
0	1	0	0	1	1	0	1	1	0	0	0	0	1	0	0	0	0
1	1	1	0	0	1	1	1	0	0	1	1	1	0	0	0	1	1
1	1	0	1	0	1	1	1	0	1	1	1	0	1	0	0	1	1
0	0	1	0	1	0	1	1	1	1	1	1	0	0	0	0	0	0
0	0	0	0	1	1	1	1	0	0	0	1	0	1	0	0	1	1
0	0	0	0	0	0	0	0	0	0	1	0	0	0	0	0	0	0
0	0	0	1	0	0	0	0	0	0	1	0	0	0	0	0	0	0
0	0	0	0	0	0	0	0	0	0	0	0	0	1	0	0	0	0
1	0	0	0	0	0	0	0	0	0	0	1	0	1	0	1	1	0
1	0	1	0	0	0	0	0	0	0	0	0	0	1	0	0	0	0
0	1	1	0	0	1	0	0	0	0	0	0	0	0	0	1	0	0
1	0	1	1	0	1	1	1	1	1	1	0	1	0	0	1	1	0
0	0	1	0	0	0	0	0	0	0	0	0	0	0	0	0	1	0
0	0	1	0	1	0	1	0	0	0	1	0	1	1	1	1	0	0
1	0	0	0	0	1	0	0	0	0	0	0	0	0	0	0	1	0
0	1	0	1	0	0	0	0	0	1	1	1	1	0	1	0	0	0
0	0	1	0	0	0	0	1	1	0	0	0	0	0	0	1	0	1
0	0	0	1	1	0	1	0	0	1	0	0	1	0	1	1	0	1
1	1	0	0	0	1	0	0	0	0	1	0	0	1	0	0	0	0
1	1	1	1	1	1	1	1	1	1	1	1	1	1	1	1	1	1
0	0	1	0	0	0	0	0	0	0	0	0	0	0	0	0	0	0
1	1	1	1	1	1	1	1	1	1	1	1	1	1	1	1	1	1
0	0	0	0	1	0	0	0	0	0	0	0	1	1	1	1	0	0
1	1	0	1	1	1	1	1	1	1	1	1	1	1	1	1	1	1
0	0	1	1	0	1	0	0	0	0	0	0	0	0	0	0	0	0
1	0	1	0	1	0	0	0	1	0	1	1	0	0	0	0	0	0
1	1	0	1	1	1	1	1	1	1	1	1	1	0	1	1	1	1
0	1	1	0	0	0	0	0	0	0	0	0	0	0	0	0	0	0
1	0	0	0	0	0	0	0	0	0	0	0	0	0	0	0	0	0
0	0	1	1	1	1	1	1	1	1	1	1	1	0	1	1	1	1
1	0	0	0	0	0	0	0	0	0	0	0	0	0	0	0	0	0
0	0	0	0	0	0	0	0	0	0	0	0	0	0	0	1	0	0
0	0	0	0	0	0	0	0	0	0	0	1	0	0	0	0	0	0
1	0	0	0	0	0	0	0	0	0	0	0	1	0	0	1	0	0
0	0	0	0	1	0	0	0	0	0	0	0	1	1	1	0	0	0
0	1	0	0	0	1	0	0	0	0	0	0	1	1	1	1	1	0
1	0	0	0	0	0	0	0	0	0	0	0	0	0	0	0	0	0
0	1	0	0	1	0	1	0	1	1	1	0	0	0	0	0	0	0
1	0	0	0	0	1	0	1	0	0	0	0	0	1	0	1	1	0
0	0	0	0	0	0	0	0	0	0	0	1	0	0	0	0	0	1
0	0	0	0	1	0	0	0	0	0	0	0	0	0	0	0	0	0
1	0	0	0	0	0	0	0	0	0	0	0	1	1	1	0	0	1
1	1	0	0	0	1	0	0	0	0	0	0	0	0	0	0	0	0
0	0	0	0	0	0	0	0	0	0	0	1	0	1	0	0	1	0
0	0	1	0	1	0	1	0	1	1	1	0	0	0	0	0	0	0
0	0	0	0	0	0	0	0	0	0	0	1	0	1	0	0	1	0
0	0	0	0	0	0	0	1	0	0	1	0	0	0	0	0	0	0
1	0	0	0	1	1	0	0	0	1	0	0	1	1	1	1	0	1
0	0	0	0	0	1	0	0	0	0	0	0	0	0	0	0	0	0
1	0	1	0	0	0	0	0	0	0	0	0	0	0	0	0	0	0
0	0	1	0	0	0	0	0	0	0	0	0	0	1	0	1	0	0
0	0	1	0	0	0	0	1	1	0	0	0	0	0	0	0	0	0
0	0	0	1	1	0	1	0	1	1	1	0	0	1	0	0	1	1
0	1	0	0	0	0	0	0	0	0	0	0	1	0	1	1	0	0
0	0	0	1	1	1	0	0	0	0	1	1	1	0	1	0	0	0
0	1	0	0	0	0	0	0	0	0	0	0	0	1	0	0	0	0
0	0	0	0	1	0	1	1	1	0	0	0	1	0	0	1	0	0
1	0	1	0	0	0	0	0	0	0	0	0	0	0	1	0	0	0
0	0	0	0	0	0	0	0	0	0	1	0	0	0	0	1	0	0
0	0	0	0	0	0	0	0	0	0	0	0	1	0	0	0	0	0
0	0	1	0	0	0	0	0	0	1	0	1	0	0	0	0	0	0
0	0	1	0	0	0	0	0	0	0	0	0	0	0	0	0	0	0
0	0	0	0	0	0	1	1	0	1	0	0	1	0	0	0	0	0
0	0	0	0	0	0	0	0	0	0	0	0	0	0	0	1	1	0
1	1	1	1	1	1	1	1	1	1	1	1	1	1	1	1	1	1
1	1	0	0	1	1	1	1	1	1	1	1	1	1	1	1	1	1
0	0	0	0	0	0	0	0	0	0	0	0	0	0	0	1	0	0
0	0	0	0	0	1	0	0	0	0	1	0	0	0	0	0	0	0
0	1	0	0	0	0	0	0	0	0	0	0	1	0	1	1	1	0
1	0	1	0	0	1	0	0	0	0	1	0	0	0	0	0	0	0
0	0	0	0	0	0	0	0	0	0	0	0	0	1	0	0	1	0
0	0	0	0	0	0	0	0	0	0	1	0	0	0	0	0	0	0
0	0	0	0	0	1	0	0	0	0	0	1	0	0	0	0	1	0
0	0	1	0	0	0	0	0	0	0	0	0	0	0	0	0	1	0
0	0	0	0	0	1	0	0	0	0	0	0	0	0	0	1	0	0
0	0	0	0	0	0	0	0	1	0	0	0	0	1	0	0	1	1
1	1	1	0	1	0	1	1	0	1	1	0	0	1	1	1	0	0
0	0	0	1	0	1	0	0	0	0	0	0	1	0	0	1	0	0
0	1	0	0	1	1	1	0	1	0	0	1	0	1	0	0	0	0
0	0	0	1	0	0	0	0	0	0	1	1	0	0	0	0	0	0
0	0	0	0	0	0	0	1	0	0	0	0	0	0	0	0	0	0
0	0	0	0	0	0	0	0	0	0	1	0	0	0	0	1	1	0
1	0	1	0	0	0	1	0	0	0	0	0	0	0	1	0	0	0
0	0	0	0	0	0	0	0	0	0	0	0	1	0	0	0	0	0
0	0	0	0	0	1	0	0	0	0	0	0	0	0	0	0	0	0
0	0	1	0	0	0	0	0	1	0	0	0	0	0	0	0	1	0
1	0	0	1	1	0	0	1	0	0	0	1	0	1	0	0	0	1
1	1	0	0	0	0	0	1	1	0	0	1	0	1	0	1	1	0
0	0	0	0	1	0	1	0	0	1	0	0	0	0	0	0	0	0
0	0	0	0	0	0	0	0	0	0	1	0	0	0	1	0	0	0
0	0	0	0	0	1	0	0	0	0	0	0	1	0	1	1	0	0
0	0	1	0	1	1	0	0	1	0	0	0	0	0	0	1	0	0
1	0	0	1	0	0	1	1	0	0	1	1	0	1	0	0	1	1
1	1	0	0	1	0	0	1	1	1	0	1	0	0	0	0	0	0
0	0	0	1	0	1	0	0	0	0	0	0	0	0	0	0	0	0
1	1	1	0	1	1	1	1	1	1	1	1	1	1	1	1	1	1
1	1	1	1	1	1	1	1	1	1	1	1	1	1	1	1	1	1
0	0	0	0	0	0	0	0	1	0	0	1	0	0	0	0	0	0
1	1	1	0	0	1	0	0	0	0	0	0	0	0	0	0	0	1
0	0	0	0	0	0	0	0	0	1	0	0	0	0	0	0	0	0
0	0	1	1	1	0	1	1	1	1	1	0	0	1	1	0	0	0
0	0	1	1	0	0	0	0	0	0	0	0	0	0	0	0	0	0
0	0	0	0	0	0	0	1	0	0	0	0	0	0	0	0	0	0
0	0	0	0	0	0	0	0	0	0	0	0	1	0	1	0	0	0
0	0	0	0	0	0	1	0	0	0	0	0	0	0	0	0	1	0
0	0	0	0	0	0	0	0	0	0	0	1	0	0	0	1	0	0
0	0	0	0	0	0	0	0	0	0	0	0	0	1	0	0	0	0
0	0	0	0	0	0	0	0	0	0	0	0	0	0	0	1	1	0
0	0	1	0	0	0	0	0	0	0	0	0	1	0	0	0	1	0
0	0	0	0	0	0	0	0	0	0	0	0	0	0	1	0	0	0
0	0	0	0	0	0	1	0	1	0	0	0	1	1	0	1	0	0
1	0	0	0	0	0	0	0	0	0	0	0	0	0	0	0	0	0
0	0	0	0	0	0	0	0	0	1	0	0	0	0	0	0	1	0
0	0	0	0	0	0	0	1	0	0	0	0	0	1	0	1	0	0
0	0	0	0	1	0	0	0	0	0	1	0	0	0	0	0	1	0
0	1	0	0	0	1	0	0	0	0	0	0	0	0	0	0	0	0
1	0	0	0	0	0	0	0	0	0	0	1	0	0	0	0	0	0
1	0	1	0	0	1	1	0	0	0	1	1	1	1	1	0	1	0
0	1	0	0	0	0	0	0	0	0	0	0	0	0	0	1	0	0
0	1	1	0	0	0	0	0	0	0	0	0	0	0	0	1	0	0
0	0	0	0	0	0	1	0	1	1	0	1	0	1	0	0	1	0
1	1	0	0	1	0	0	1	1	0	1	0	0	1	1	1	0	0
0	0	0	1	0	1	1	0	0	1	0	1	1	0	0	0	0	0
0	0	0	1	0	0	0	0	0	0	0	0	0	0	0	0	0	0
0	0	1	0	0	0	0	0	0	0	0	1	0	0	0	0	0	0
1	1	0	0	0	0	0	0	0	0	0	0	0	0	0	0	1	0
0	0	0	0	0	0	0	0	0	0	0	0	0	0	0	0	1	0
1	0	1	0	0	1	0	0	0	0	0	0	0	0	0	0	0	0
0	0	0	0	0	0	0	0	0	0	1	1	0	0	0	0	0	0
0	0	0	1	0	0	0	0	0	1	0	1	0	0	0	0	0	0
0	0	0	0	0	0	0	0	0	0	0	0	0	0	1	1	1	0
0	0	1	1	1	0	1	0	1	0	0	0	1	1	0	0	0	0
1	1	0	1	1	1	1	1	1	1	1	1	1	1	0	1	0	0
0	0	1	0	0	0	0	0	0	0	0	0	0	0	0	0	1	0
0	1	0	0	0	0	0	0	0	0	0	0	0	0	0	0	0	1
0	0	0	0	0	1	1	0	0	0	1	0	1	1	1	1	1	0
0	0	0	0	1	0	0	1	1	0	0	1	0	0	0	0	0	0
0	0	0	0	0	0	0	0	0	0	0	0	0	0	0	0	1	0
0	0	1	0	0	0	0	0	0	0	0	1	1	1	1	1	1	0
1	0	0	0	1	0	1	0	0	0	0	0	0	0	0	0	0	1
0	1	0	0	0	1	1	1	1	1	1	1	1	1	1	0	0	0
1	0	0	1	1	0	0	0	0	0	0	0	0	0	0	1	0	0
0	0	0	0	0	1	1	0	1	0	1	1	0	0	0	0	0	0
1	1	0	0	1	1	1	1	1	1	1	0	1	1	1	1	0	1
1	0	1	0	0	1	1	1	0	0	0	0	0	0	0	0	0	0
0	0	1	0	0	0	0	1	0	0	0	0	0	0	0	0	0	0
1	1	1	1	1	1	1	1	1	1	1	1	1	1	1	1	1	1
0	0	1	0	0	0	0	0	0	1	0	0	0	0	0	0	0	0
0	0	0	0	0	0	0	0	0	0	0	0	0	0	0	0	0	1
0	0	0	0	0	0	0	0	0	0	0	0	0	0	0	1	0	0
0	0	0	0	0	0	0	0	0	0	0	0	0	1	0	1	1	0
1	0	0	0	0	0	0	1	0	0	0	0	0	0	0	0	0	0
0	0	0	0	0	0	0	0	0	1	0	0	0	1	0	0	0	0
0	0	0	1	0	0	0	1	0	0	1	0	0	0	0	0	1	0
0	0	0	0	0	0	0	0	0	0	0	0	1	0	0	0	0	0
0	1	0	0	0	0	0	0	0	0	0	0	0	0	0	0	0	0
0	0	0	0	0	0	0	0	0	0	0	0	0	0	0	0	1	0
0	0	0	0	0	0	0	0	0	1	0	0	0	0	0	0	0	0
0	1	0	1	0	0	0	0	0	0	0	0	0	0	0	0	0	0
0	0	0	0	0	0	0	0	0	0	0	0	0	0	0	1	1	0
0	0	0	0	0	1	0	0	0	0	0	0	1	0	0	0	0	1
1	0	0	0	0	0	0	0	0	0	1	0	0	1	1	0	0	0
0	0	0	0	1	0	0	0	0	0	0	0	0	0	0	1	0	0
0	1	0	0	0	0	0	0	0	0	0	0	0	0	0	0	0	0
0	0	0	0	1	0	0	0	0	0	0	0	0	0	0	0	0	0
0	0	0	0	0	0	0	0	0	0	1	0	1	0	0	1	0	0
0	0	0	0	0	0	0	0	1	0	0	0	0	1	1	0	0	0
0	1	0	0	0	0	0	0	0	0	0	0	0	0	0	1	0	1
0	0	1	0	0	0	0	0	0	0	0	1	0	0	0	0	0	0
1	0	0	0	0	0	0	0	1	0	0	0	1	0	0	0	0	0
0	1	0	0	1	0	0	0	0	0	0	0	0	1	1	0	0	0
0	0	0	1	0	0	0	0	0	0	0	1	1	0	0	0	0	0
0	0	0	0	0	1	0	0	0	0	0	0	0	1	0	0	1	0
1	0	0	0	0	0	0	0	0	0	0	1	0	0	0	0	0	1
0	1	0	0	0	0	0	1	0	0	1	0	0	0	0	0	0	0
0	0	0	1	0	1	0	0	0	0	0	0	0	0	1	1	0	0
1	0	0	0	0	0	0	0	0	0	0	0	0	0	0	0	0	1
0	0	0	0	0	0	1	1	1	1	1	0	0	1	1	0	0	0
0	0	1	0	1	0	0	0	0	0	0	1	0	0	0	0	0	0
1	1	0	1	0	0	0	0	0	1	0	0	1	0	0	1	1	1
0	0	0	0	0	1	1	1	1	0	1	1	0	1	1	0	0	0
0	0	0	0	0	0	0	1	0	0	0	0	0	0	0	0	1	0
1	1	0	0	0	0	0	0	1	1	1	0	0	0	0	0	0	1
0	0	1	0	1	0	0	0	0	0	0	1	0	1	0	0	0	0
0	0	0	1	0	1	0	0	0	0	0	0	0	0	1	0	0	0
0	1	0	0	1	1	1	0	1	0	0	0	0	0	0	1	0	0
1	0	0	0	0	0	0	0	0	0	0	0	0	0	0	0	1	1
0	0	1	0	1	0	0	0	0	0	0	0	0	0	1	0	0	0
0	0	0	0	0	0	1	1	1	1	0	1	0	0	0	0	0	0
0	0	0	1	1	1	0	0	0	0	0	0	1	0	0	0	0	1
1	1	0	0	0	0	0	0	1	0	0	0	1	0	0	0	0	0
0	0	0	0	1	0	0	0	0	0	0	0	0	0	0	0	1	0
0	0	0	0	0	1	1	1	1	1	1	1	0	0	1	1	0	0
0	0	0	0	0	0	0	0	0	0	0	0	1	1	0	0	0	0
0	0	0	0	0	0	0	0	0	0	0	0	0	0	0	0	1	1
0	0	0	1	0	0	0	0	0	0	1	1	0	0	0	0	0	0
0	0	0	0	1	0	0	0	0	0	0	0	1	0	1	0	0	0
0	0	0	1	0	0	0	0	0	0	0	0	0	0	0	0	0	0
0	0	0	0	0	0	0	1	0	0	0	1	0	0	0	0	0	1
0	0	0	0	0	0	0	0	0	0	0	0	1	0	1	1	0	0
0	0	0	0	0	0	0	0	0	0	0	0	1	0	0	0	0	0
0	0	0	0	0	0	1	0	0	1	1	0	0	0	1	1	0	0
0	0	0	0	0	1	0	0	0	0	0	0	1	0	0	0	0	0
1	0	0	0	0	0	0	0	0	0	0	0	0	1	0	0	0	0
0	0	0	1	0	0	0	0	0	0	0	1	0	0	0	0	1	0
0	0	0	0	0	1	0	0	0	0	0	0	0	0	0	0	0	0
0	0	0	0	0	0	0	0	0	0	1	0	0	1	0	0	0	0
0	0	0	0	1	0	0	1	1	0	0	0	1	0	1	0	0	0
0	0	0	0	0	0	1	0	0	0	0	0	0	0	0	1	0	0
0	0	0	1	0	0	0	0	0	0	0	0	0	0	0	0	1	0
0	0	0	0	0	0	0	0	0	0	0	0	1	0	0	0	0	0
0	0	0	1	0	0	0	0	0	0	0	0	0	0	0	0	1	0
0	0	1	0	0	0	0	0	1	0	0	0	0	0	0	0	0	0
0	0	0	0	0	0	1	0	0	0	1	1	0	1	0	0	0	0
0	0	0	0	0	0	0	0	0	0	0	0	1	0	1	0	0	0
0	0	0	0	0	0	0	0	0	0	0	0	0	0	0	0	1	0
0	1	0	0	1	1	1	1	1	1	1	1	1	1	1	0	0	1
0	0	0	0	0	0	0	0	0	0	0	0	0	0	0	0	1	0
1	0	1	0	0	0	0	0	0	0	0	0	0	0	0	1	0	0
1	0	1	1	1	1	1	1	1	1	1	1	1	1	1	1	1	1
1	0	1	1	0	0	0	0	0	0	0	0	0	0	0	0	1	0
0	0	0	0	0	0	0	0	0	1	0	0	0	0	0	0	0	0
1	0	1	0	0	0	0	0	1	0	0	0	0	0	0	1	0	0
1	1	0	0	0	1	1	1	0	0	1	0	0	1	1	0	1	0
0	0	1	1	0	0	0	0	0	0	0	1	0	0	0	0	0	0
0	0	1	0	0	0	0	0	0	0	0	0	0	0	0	0	0	1
0	0	0	0	0	0	0	0	1	1	1	0	1	0	0	0	0	0
1	0	0	0	0	1	1	1	0	0	0	0	0	0	1	1	1	0
0	0	0	1	0	0	0	0	0	0	0	0	0	0	0	0	0	0
0	0	1	0	0	1	0	0	0	0	0	0	0	0	0	0	0	0
0	0	0	0	0	0	1	1	0	0	0	0	0	1	0	1	1	1
1	1	0	1	1	1	1	1	1	1	1	0	1	1	1	1	1	1
0	1	0	0	0	0	0	0	0	0	0	0	0	0	0	0	0	0
0	0	0	1	0	0	0	0	0	0	0	1	1	0	0	0	0	0
0	1	1	0	1	0	1	1	1	1	1	0	0	0	0	1	1	0
0	0	1	0	0	1	0	0	0	0	0	0	0	0	0	0	0	0
0	0	0	1	0	0	0	1	1	0	0	0	0	0	0	0	0	1
0	1	0	0	0	0	0	0	0	0	0	0	0	0	0	0	0	0
0	0	0	0	0	0	0	0	0	0	0	1	0	0	0	0	0	0
0	0	0	1	0	0	0	0	0	0	0	0	0	0	0	0	0	0
1	0	0	0	1	0	0	0	0	0	0	1	0	0	0	0	0	0
0	0	0	0	0	0	0	0	0	0	0	0	1	0	1	0	1	0
1	0	0	0	0	0	0	0	0	0	0	0	0	0	0	0	0	0
0	0	0	0	1	0	0	0	0	0	0	0	0	0	0	1	0	0
0	0	0	0	0	1	0	0	0	0	0	0	0	0	0	0	0	0
0	0	0	0	1	0	0	1	1	1	0	0	1	1	1	0	0	0
0	0	0	0	0	0	0	0	0	0	0	1	0	0	0	1	1	0
1	1	1	1	0	1	1	0	1	1	1	0	0	1	0	0	0	0
0	0	0	0	0	1	0	0	0	0	0	0	0	0	0	1	0	0
0	1	1	0	0	1	1	1	1	0	1	1	0	0	0	0	0	0
0	0	0	0	1	0	0	0	0	0	0	0	1	0	1	1	0	1
0	0	1	0	0	0	0	0	0	0	0	0	0	0	0	0	0	0
1	1	0	0	0	0	0	0	0	0	0	0	0	0	0	0	0	0
0	0	1	0	0	0	0	0	0	0	0	0	0	0	0	0	0	0
0	0	1	0	0	0	1	1	1	1	1	1	1	1	0	0	0	0
0	1	0	0	1	0	1	0	0	0	0	0	0	0	1	1	1	1
1	0	0	1	1	0	0	1	1	0	1	0	1	1	0	1	0	0
0	1	1	0	0	1	0	0	0	1	0	0	0	0	1	0	1	0
0	0	0	0	0	0	0	0	0	0	0	0	0	0	0	0	0	1
1	0	1	1	0	1	0	0	0	0	0	0	0	0	0	0	0	0
0	1	0	0	0	0	0	0	0	1	0	1	0	0	0	0	0	0
1	0	0	0	1	0	1	1	1	0	1	0	1	1	1	1	1	1
0	0	0	1	0	0	0	0	0	0	0	0	0	0	0	0	0	0
0	0	0	0	1	0	1	1	1	0	1	1	0	0	0	1	0	0
0	0	1	0	0	1	0	1	0	1	0	0	0	1	0	0	0	1
1	1	0	0	0	0	0	0	0	0	0	0	0	0	0	0	1	1
0	0	1	0	1	1	0	1	1	0	0	0	0	0	0	0	0	0
0	1	0	0	0	0	0	0	0	0	0	0	0	1	0	0	0	0
0	0	1	1	0	0	0	0	0	0	0	0	0	0	0	0	0	0
0	0	0	0	0	0	0	0	0	1	0	0	1	0	1	0	1	0
0	0	0	0	1	0	0	1	0	0	0	1	0	0	0	0	0	0
0	0	1	0	0	0	0	0	0	0	0	0	0	1	0	0	0	0
1	0	0	0	0	0	1	0	0	0	1	1	0	0	0	0	0	0
0	0	0	0	0	0	0	0	0	0	0	0	0	0	0	0	0	1
0	1	0	0	0	0	0	0	0	0	0	0	0	0	0	0	0	0
0	0	0	0	0	0	0	0	0	0	0	0	1	0	0	0	0	0
0	0	0	0	0	0	0	0	0	0	0	0	0	1	0	0	0	0
0	1	1	0	0	0	0	0	0	0	0	0	0	0	0	0	0	0
0	0	0	0	0	0	0	0	0	0	0	0	0	0	0	0	1	0
0	0	0	0	0	0	0	0	0	0	0	1	0	0	0	1	0	0
0	1	0	0	0	0	0	0	0	0	0	0	1	1	0	0	0	0
0	0	0	0	0	0	1	0	0	0	0	0	1	0	0	0	0	0
1	0	0	0	0	0	0	0	0	0	0	0	0	0	0	0	0	0
0	0	0	0	0	0	0	0	0	0	0	0	0	1	0	0	0	0
0	1	0	0	0	1	0	0	0	0	0	0	0	0	0	0	0	0
1	0	0	0	1	0	0	1	0	1	1	0	0	0	0	0	0	0
0	0	0	0	0	1	1	0	0	0	0	0	1	1	1	1	1	0
0	0	0	0	0	0	0	0	1	0	0	0	0	0	0	0	0	0
0	0	0	0	1	0	0	1	0	0	1	0	0	0	0	0	0	0
0	1	0	1	0	0	0	0	0	0	0	0	0	0	0	0	1	0
0	0	0	0	0	0	0	0	0	0	0	0	0	1	0	0	0	0
1	0	0	0	0	0	0	1	1	0	0	0	0	0	0	0	0	0
0	0	0	0	1	0	0	0	0	1	0	0	0	0	0	0	0	0
0	1	1	0	0	0	1	0	0	0	0	1	1	1	1	1	1	1
0	0	0	1	0	0	0	0	0	0	0	0	0	0	0	0	0	0
1	0	0	0	1	1	1	0	1	1	1	0	0	1	0	1	0	0
0	0	0	0	0	0	0	0	0	0	0	0	0	0	0	0	1	0
0	0	1	0	1	0	1	1	1	1	1	0	0	1	0	1	1	0
1	1	1	0	0	0	0	0	0	0	0	0	0	0	1	0	0	0
0	0	0	0	0	0	0	0	0	0	1	0	0	0	0	0	0	0
0	0	0	0	0	1	0	0	0	1	0	1	0	1	0	1	0	1
1	1	0	0	1	0	1	1	1	1	1	0	1	0	1	1	1	1
0	0	0	0	0	0	0	0	0	0	0	0	0	1	0	0	0	0
0	0	1	0	1	1	1	0	0	0	0	1	0	0	0	0	0	0
0	0	0	0	0	0	1	0	0	1	0	0	0	0	0	1	0	1
0	0	0	0	0	1	0	0	0	0	0	0	0	0	0	0	0	0
0	1	1	1	1	0	1	1	1	1	1	0	0	0	0	0	0	0
0	0	0	0	0	0	0	0	0	0	0	0	1	1	1	1	0	1
0	0	1	0	0	1	0	0	0	0	0	0	0	0	0	0	0	0
1	1	1	0	1	1	1	1	1	1	1	1	1	1	1	1	1	1
1	0	0	0	0	0	0	0	0	0	0	1	0	0	0	0	0	0
0	0	0	0	0	0	0	0	0	0	0	0	1	0	0	1	0	0
0	0	0	0	0	0	0	0	0	0	0	0	0	0	0	0	1	0
0	0	0	0	0	0	0	0	0	0	0	0	0	0	0	1	0	0
1	0	0	0	0	0	0	1	0	0	0	0	0	0	0	0	0	0
0	1	0	0	0	0	1	0	0	0	0	0	0	1	0	1	0	0
0	0	0	0	0	0	0	0	0	1	0	0	1	0	0	0	0	0
0	0	0	0	0	0	0	0	0	0	0	1	0	0	0	0	0	0
1	0	0	0	0	0	0	1	0	0	0	0	0	0	0	0	0	0
0	0	1	0	0	0	0	0	0	0	0	0	0	0	1	0	1	0
0	1	0	0	0	0	1	0	0	0	0	0	0	1	0	1	0	0
0	0	0	0	0	1	0	0	0	0	0	1	0	0	0	0	0	0
0	0	0	1	0	0	0	0	0	0	0	0	0	0	0	0	0	0
1	1	0	1	1	1	1	1	1	1	1	0	1	0	1	0	1	1
0	0	1	0	0	0	0	1	0	0	0	0	0	1	0	0	1	1
1	0	0	0	0	1	0	0	0	0	1	0	0	1	0	0	0	0
0	0	0	0	0	0	0	0	0	1	0	0	0	0	0	0	0	0
0	0	0	0	0	0	0	0	0	0	0	0	0	0	0	0	1	0
0	0	0	0	0	0	1	0	1	0	0	0	0	0	0	0	0	0
0	0	0	0	0	0	0	0	0	0	0	0	0	1	0	1	0	0
0	0	0	0	0	0	0	0	0	0	1	0	1	0	0	0	1	0
1	0	0	1	0	1	0	0	0	1	0	0	0	0	0	0	0	0
1	0	1	0	0	0	1	0	0	1	0	0	0	1	0	1	1	0
0	0	0	0	0	0	0	0	0	0	1	0	1	0	1	0	0	1
0	0	0	0	0	0	0	0	0	0	1	0	1	0	1	0	0	1
0	0	0	0	1	1	0	0	0	0	0	0	0	0	0	0	0	0
0	1	0	0	0	0	0	1	1	0	0	1	0	0	0	0	0	1
1	0	0	0	0	0	0	0	1	0	0	0	0	0	0	0	0	0
0	1	1	1	1	0	1	1	0	0	0	0	0	0	1	1	1	1
1	0	0	0	0	0	0	0	0	0	0	0	0	0	0	0	0	0
0	0	1	0	0	0	0	0	0	0	0	0	1	1	1	1	1	1
0	0	0	1	1	1	1	0	1	0	0	0	0	0	0	0	0	0
0	0	0	0	0	0	0	1	0	0	1	0	1	0	1	0	0	1
1	1	0	0	1	1	1	1	1	1	1	0	0	0	0	0	0	1
0	0	0	0	0	0	0	0	0	0	0	0	1	1	1	1	1	0
0	0	0	1	0	0	0	0	0	0	0	0	0	0	0	0	0	0
1	0	1	0	0	0	0	0	0	0	0	0	1	1	0	0	0	0
0	0	0	0	0	1	0	1	0	1	1	0	0	0	0	1	0	1
0	1	1	1	0	0	0	0	0	0	0	0	0	0	0	0	0	0
0	0	0	0	1	0	1	1	1	0	0	0	0	0	0	0	0	0
1	0	0	0	0	1	0	0	0	1	0	0	0	1	0	1	1	0
0	0	1	0	0	0	1	1	0	0	0	1	1	0	0	0	0	1
0	0	0	0	0	0	0	0	0	0	0	0	0	0	1	1	0	0
0	0	0	1	0	0	0	0	0	0	0	0	0	0	0	0	0	1
0	1	1	0	0	1	1	1	0	1	0	1	1	0	0	0	0	0
1	0	0	0	1	0	0	0	0	0	0	0	0	1	1	0	0	1
0	0	1	0	0	0	0	0	0	0	0	0	0	0	0	1	0	0
0	0	1	0	0	0	0	0	0	0	0	0	0	0	0	0	0	0
0	0	0	0	0	0	0	0	0	0	0	0	0	0	0	0	1	0
0	0	0	0	0	1	0	0	0	0	0	0	0	0	0	0	0	0
0	0	0	0	1	0	0	0	0	0	0	0	0	0	0	0	0	0
0	0	1	0	0	0	0	0	0	0	0	0	0	0	0	0	0	0
0	0	0	0	0	0	0	0	0	0	0	0	0	1	0	0	0	0
0	0	0	0	1	0	0	0	0	0	0	0	1	0	0	0	0	0
0	0	0	0	0	0	0	0	0	0	0	0	0	0	0	1	0	0
0	0	0	1	0	0	0	0	0	1	1	0	1	0	1	0	1	0
0	0	0	0	1	0	0	0	0	0	0	1	0	0	0	0	0	0
0	0	0	0	0	1	0	0	0	0	0	0	0	0	0	0	0	0
0	0	0	0	0	0	0	0	0	0	0	1	0	0	0	0	0	0
0	0	0	0	0	0	0	0	0	0	0	0	0	1	0	1	0	1
0	0	0	0	0	0	0	0	1	1	1	0	1	0	1	0	1	0
0	1	0	0	1	0	1	0	0	0	0	0	0	0	0	1	0	0
0	0	0	0	0	0	0	0	1	0	0	0	0	0	0	0	0	0
0	0	0	0	0	0	0	0	0	0	0	1	0	0	0	0	0	0
0	1	0	1	0	0	0	0	0	0	1	0	0	0	0	0	0	0
0	0	1	0	0	0	0	0	0	0	0	0	0	0	0	0	0	0
0	0	0	0	0	0	0	1	1	1	0	0	1	0	1	0	0	1
0	0	1	0	0	0	0	0	0	1	0	0	0	0	0	0	1	0
0	0	0	0	0	0	0	0	0	0	0	0	0	0	0	0	0	1
0	0	0	1	0	1	0	0	1	0	0	1	0	0	0	0	0	0
0	0	0	0	0	0	0	1	0	0	1	0	0	0	0	0	0	0
0	0	0	0	0	0	0	0	1	1	0	1	0	0	0	0	1	0
0	0	0	0	0	0	0	0	0	0	0	0	1	0	1	1	1	0
0	0	0	0	0	1	1	0	0	0	0	0	0	1	0	0	0	0
1	1	0	1	1	1	0	1	0	1	0	0	0	0	1	0	0	0
0	0	0	0	0	0	1	0	0	0	1	1	0	0	0	0	1	0
0	0	1	0	1	0	0	0	0	0	0	0	0	0	0	0	0	0
0	0	0	0	0	0	0	0	0	0	0	0	0	0	0	0	0	1
1	1	0	0	1	1	1	0	1	0	1	0	1	1	1	1	1	1
0	0	1	0	0	0	0	1	0	1	0	1	0	0	0	0	0	0
0	1	0	0	0	0	0	0	0	1	0	0	0	0	0	1	0	0
0	0	1	0	0	0	1	1	0	0	0	0	0	0	0	0	0	0
0	0	0	0	1	0	0	0	0	1	1	0	0	0	0	0	1	0
0	0	1	0	0	0	1	0	1	0	0	0	0	0	0	0	0	1
1	1	0	0	0	1	0	1	0	0	0	0	0	0	0	0	0	0
0	0	0	0	0	0	0	1	0	0	0	0	0	1	0	0	0	1
1	1	1	1	1	1	1	1	1	1	1	1	1	1	1	1	1	1
0	0	0	0	0	0	0	0	0	0	1	0	0	0	0	0	0	0
0	0	1	0	1	1	1	0	1	1	1	0	0	1	0	1	1	1
0	0	1	0	0	0	0	1	1	0	0	0	0	0	0	0	0	0
0	0	0	1	0	0	0	0	0	0	0	0	0	0	0	0	0	0
0	0	1	0	0	0	0	0	0	0	0	0	0	0	0	0	0	0
0	0	0	0	0	0	0	1	0	0	0	0	0	0	0	0	0	0
0	0	0	0	0	0	0	0	0	0	0	1	0	0	0	0	0	0
0	0	0	0	0	0	0	0	0	0	0	1	0	0	0	0	0	0
0	1	0	0	0	0	0	0	0	0	0	0	0	0	0	0	1	0
1	0	0	0	0	0	0	0	0	0	0	0	0	0	0	0	0	0
0	0	0	0	0	1	0	0	0	0	0	0	1	1	1	0	0	0
0	0	0	1	0	0	0	0	0	0	0	0	0	0	0	0	0	0
1	0	0	0	0	0	0	1	0	0	0	0	1	0	1	1	0	0
0	0	0	0	0	1	0	0	0	0	0	1	0	0	0	0	0	0
0	0	1	0	0	0	0	0	0	0	0	0	0	0	0	0	0	0
0	0	0	1	0	0	0	0	0	0	0	0	0	0	0	1	0	0
0	0	0	0	0	0	0	1	0	0	1	0	1	0	1	0	0	0
0	0	0	0	0	0	1	0	0	0	0	0	0	0	0	0	0	0
0	0	0	0	0	0	0	0	0	0	0	0	0	1	0	0	0	0
0	0	0	0	1	1	0	1	1	1	0	0	0	0	1	0	0	0
1	1	0	0	0	0	1	0	0	0	0	0	1	0	0	0	1	0
0	0	0	0	0	0	0	0	0	0	0	1	0	1	0	0	0	0
0	0	0	0	0	0	0	0	0	0	0	0	0	0	0	1	0	0
0	0	0	0	0	0	0	0	0	0	0	0	1	0	0	0	0	0
0	0	0	0	0	0	0	0	0	0	0	0	0	0	1	0	0	0
0	0	0	0	0	0	0	0	0	0	0	0	0	0	0	1	0	0
1	0	1	0	0	0	0	0	0	1	0	1	1	1	1	0	1	0
0	1	0	0	1	0	1	1	1	0	1	0	0	0	0	0	0	0
0	0	0	1	0	0	0	0	0	0	0	0	0	0	0	0	0	0
1	1	1	0	1	1	1	1	1	1	1	1	1	1	1	1	1	1
0	0	0	0	0	0	0	0	0	0	0	0	0	0	0	0	0	1
1	0	0	0	0	0	0	0	0	0	0	0	0	0	0	0	0	0
0	0	0	0	0	0	0	0	0	1	0	1	0	0	0	1	1	0
0	0	1	0	0	0	0	0	1	0	0	0	0	0	0	0	0	0
1	1	0	0	0	0	1	0	0	0	0	0	0	0	0	0	0	0
1	0	0	0	0	0	0	0	0	0	0	0	0	0	0	0	0	1
0	1	0	0	0	0	0	0	0	0	0	0	0	0	1	0	0	0
0	0	0	1	1	1	1	0	0	0	0	0	0	1	0	1	0	0
0	0	0	0	0	0	0	1	1	1	1	0	0	0	0	0	0	1
0	1	0	0	0	0	0	0	0	0	0	0	0	0	0	0	1	0
1	0	1	1	1	1	1	1	1	1	1	1	1	1	1	1	0	0
1	1	0	0	0	0	0	0	0	0	0	0	0	0	0	0	0	0
0	0	0	1	1	1	1	1	1	1	0	0	1	1	1	0	0	1
0	0	1	0	0	0	0	0	0	0	0	0	0	0	0	0	0	0
1	1	0	0	0	0	0	0	0	0	0	0	0	0	0	0	0	1
0	0	0	1	0	1	0	0	0	0	0	1	0	0	0	0	0	0
0	0	1	0	1	0	0	0	1	1	0	1	0	1	1	0	0	0
0	0	0	1	0	0	0	0	0	0	0	0	0	0	0	0	0	0
0	0	0	0	0	0	0	0	0	0	0	1	0	0	0	0	1	0
0	0	0	0	0	0	0	0	0	0	0	0	0	0	0	1	0	0
0	0	0	0	0	0	0	0	0	0	0	0	0	0	0	0	1	0
0	0	0	0	0	0	0	0	0	0	0	0	0	0	0	1	0	0
0	0	0	0	0	0	0	0	0	0	0	0	0	0	0	1	1	0
0	0	1	0	0	0	0	0	0	0	0	0	0	0	0	0	0	0
0	0	1	0	0	0	0	0	1	0	0	1	0	0	0	0	0	0
0	0	0	1	0	0	0	1	0	0	0	0	0	1	0	0	0	0
0	0	0	0	0	0	0	0	0	0	1	0	0	0	0	0	1	0
0	0	0	0	0	0	0	0	0	0	0	0	1	0	1	0	0	0
0	0	0	0	0	0	0	0	0	0	0	0	0	0	0	1	0	0
0	0	1	1	0	0	0	0	0	0	0	0	0	0	0	0	0	0
0	0	0	0	1	0	1	1	1	0	0	0	1	0	0	0	0	0
1	1	0	0	0	1	0	0	0	1	0	0	0	1	1	1	0	0
0	0	0	0	0	0	0	0	0	0	0	0	1	0	1	0	1	0
1	0	0	0	0	0	0	0	0	0	0	0	0	0	0	0	0	0
0	0	1	1	0	0	0	1	0	0	0	1	0	0	0	0	0	0
0	0	0	0	0	0	0	0	0	0	1	0	1	0	0	0	0	0
0	0	0	0	1	1	0	0	1	0	0	0	0	0	0	1	0	0
1	0	0	1	0	0	0	0	0	0	0	1	0	0	0	0	0	0
0	0	1	0	0	0	0	0	0	0	0	0	0	0	0	0	0	0
0	1	0	0	0	0	0	0	0	1	0	0	0	0	1	0	1	0
0	0	1	0	1	0	0	0	0	0	0	0	0	0	0	0	0	0
1	1	0	0	0	1	1	1	1	0	0	0	0	1	1	0	0	0
0	0	0	0	0	0	0	0	0	1	0	1	1	0	1	0	0	1
0	0	0	0	0	0	0	0	0	0	0	1	0	0	0	0	0	0
0	0	1	1	0	0	0	1	0	0	1	0	0	0	0	0	0	0
1	0	0	0	0	0	1	0	0	1	0	0	1	0	0	0	0	0
0	0	0	0	1	1	0	0	1	0	0	0	0	1	0	1	1	0
1	1	0	0	0	0	0	0	0	0	1	1	1	0	1	0	0	1
1	0	0	1	0	0	0	0	0	0	0	0	0	0	0	0	0	0
0	0	1	0	0	0	0	0	0	0	0	0	0	0	0	0	0	0
0	1	0	1	1	1	1	1	1	1	1	0	1	0	1	0	0	0
1	0	1	0	0	0	0	0	0	0	0	1	0	1	0	1	1	0
0	0	0	0	0	1	0	0	0	0	0	0	0	0	0	0	0	0
0	0	0	0	1	0	0	0	1	0	0	0	1	0	1	1	0	1
0	0	1	0	0	0	1	0	0	0	0	0	0	0	0	0	1	0
0	1	0	0	0	0	0	0	1	0	0	0	0	0	0	0	0	0
0	0	0	1	0	0	0	0	0	0	0	0	0	0	0	0	0	0
0	0	0	0	0	1	0	0	0	1	0	0	0	0	0	0	0	0
0	0	0	1	0	0	0	1	1	0	1	0	0	1	0	0	0	0
0	0	0	0	0	0	0	0	0	1	0	0	1	0	1	1	0	0
0	0	0	0	0	0	0	0	0	0	0	0	0	0	0	0	0	1
0	0	1	0	0	1	0	0	0	0	0	0	0	0	0	0	0	0
0	0	0	1	0	0	1	0	0	0	0	1	1	1	1	1	0	0
0	0	0	0	0	0	0	1	0	0	0	1	0	0	0	0	0	1
0	0	1	0	0	0	0	0	0	0	0	0	0	0	0	0	0	0
0	0	0	0	0	0	0	0	0	0	0	0	0	0	1	0	0	0
0	0	0	1	0	0	0	0	0	0	0	0	0	0	0	0	0	1
0	0	0	0	0	0	1	1	0	0	0	0	0	0	1	0	0	0
0	0	0	0	0	0	0	0	0	0	0	0	0	0	0	0	0	1
0	0	0	1	0	0	0	0	0	0	0	0	0	0	0	0	0	0
0	0	0	1	0	0	0	0	0	0	0	0	0	0	0	0	0	0
0	0	0	0	0	0	0	0	0	0	0	1	0	0	0	0	0	0
0	0	0	0	1	1	0	0	0	1	0	0	1	0	1	1	1	0
1	0	0	0	0	0	0	0	0	0	0	0	0	1	0	0	0	0
0	0	0	0	0	1	0	0	0	0	0	0	0	0	0	1	0	0
1	1	0	0	0	0	0	0	0	0	0	0	0	0	0	0	0	0
0	0	0	0	0	0	0	0	0	0	0	1	0	0	0	0	0	0
0	0	0	1	0	0	0	0	0	0	0	0	0	0	0	0	0	0
0	0	0	1	0	0	0	0	0	0	0	0	0	0	0	0	0	0
0	0	0	0	0	0	1	0	0	0	0	0	0	0	0	0	0	0
0	0	0	0	1	1	0	0	0	1	0	0	1	1	1	1	1	0
1	1	0	0	0	0	0	0	0	0	0	0	0	0	0	0	0	0
1	1	1	1	1	1	1	0	0	1	0	0	1	1	1	1	1	0
0	0	0	0	0	0	0	1	0	0	0	0	0	0	0	0	0	0
0	1	0	0	1	0	0	0	0	0	0	0	0	0	0	1	0	0
0	0	0	0	0	1	1	0	0	1	1	0	0	0	0	0	0	0
0	1	1	0	0	0	0	1	0	0	0	0	0	1	0	0	0	0
0	0	0	1	0	0	0	0	0	0	1	1	0	0	0	0	0	0
0	1	0	0	0	1	1	0	0	1	0	1	0	1	0	0	0	0
0	0	1	1	0	0	1	1	1	1	0	0	1	0	0	1	1	0
0	0	1	0	0	1	0	0	0	0	1	0	0	0	0	0	0	0
1	1	0	0	1	0	1	0	0	1	0	0	1	1	1	0	0	0
0	0	1	0	0	0	0	0	0	0	0	0	0	0	0	0	0	0
0	0	0	1	0	0	0	1	0	0	0	0	1	0	1	0	0	0
1	1	1	0	1	1	1	1	1	1	1	1	1	1	1	1	1	1
0	1	0	1	1	0	1	1	0	1	0	1	1	1	1	1	0	0
0	1	1	0	1	0	0	0	0	1	1	0	1	1	1	0	0	0
0	0	0	0	0	0	0	0	0	0	0	0	0	0	0	0	0	1
0	0	0	0	0	0	1	1	1	0	1	0	0	0	0	1	0	0
1	0	0	1	0	0	0	0	0	0	0	1	0	0	0	0	0	0
1	0	0	1	0	0	1	0	0	0	0	0	0	0	0	0	0	0
0	0	0	0	0	0	0	1	1	0	0	1	0	0	0	1	0	0
1	0	0	1	0	0	0	0	1	0	0	0	0	0	0	0	0	1
0	1	0	0	0	0	0	0	0	0	0	0	0	0	0	0	0	0
0	0	0	1	0	0	0	0	0	0	0	0	0	0	0	0	0	0
1	0	0	0	0	0	0	0	0	0	0	0	0	0	0	0	0	0
1	1	0	1	1	1	1	1	1	1	1	1	1	1	1	1	1	1
0	0	0	0	0	0	0	1	0	0	0	0	0	0	0	0	0	0
0	0	0	0	0	0	0	0	0	0	1	0	0	0	0	0	0	0
0	0	0	0	0	0	0	0	0	0	0	1	1	0	1	0	0	0
0	0	0	0	0	0	0	1	0	0	0	0	0	0	0	0	0	0
1	1	1	0	0	1	1	0	0	0	0	0	0	0	0	0	0	1
0	0	0	1	0	0	0	0	1	0	0	1	0	1	1	1	1	0
0	0	0	0	0	0	0	1	0	0	0	0	0	0	0	1	1	0
0	0	0	0	1	0	0	0	0	0	0	0	0	1	1	0	0	0
0	0	0	0	0	0	0	0	0	1	0	0	1	0	0	0	0	0
0	0	1	0	1	1	0	0	0	0	0	0	0	0	0	1	1	0
0	0	0	0	1	0	0	0	1	0	0	0	0	0	0	0	1	0
0	0	0	0	0	0	0	1	0	0	0	0	1	1	1	0	0	0
1	1	1	0	1	1	1	0	1	0	0	0	1	0	1	0	0	0
0	0	0	0	0	0	0	0	0	0	0	0	0	1	0	1	1	0
0	0	0	0	0	1	1	1	1	0	0	0	0	0	0	0	0	0
1	1	1	0	0	0	0	0	0	0	0	0	1	0	1	0	0	0
0	0	0	0	0	0	0	1	0	0	0	1	0	0	0	0	0	0
0	0	0	1	0	0	0	0	1	0	0	0	1	0	0	1	0	0
1	1	0	0	1	1	1	1	1	1	1	0	0	0	0	0	0	1
1	1	1	0	0	1	0	0	0	0	0	1	1	1	1	1	1	0
0	0	0	0	0	0	0	0	1	0	0	0	0	1	1	1	0	1
0	0	0	0	0	0	0	1	0	0	0	0	0	0	0	0	0	0
0	0	1	1	0	0	0	0	0	0	1	1	0	0	0	0	0	1
0	1	1	0	0	0	1	0	1	1	1	0	0	0	0	0	0	0
0	0	0	1	0	0	0	0	0	0	0	0	1	1	1	0	1	1
0	1	0	0	0	1	0	0	1	1	0	0	0	0	0	0	0	0
1	0	0	0	0	0	0	0	0	0	0	0	0	0	0	0	0	1
0	0	0	0	0	0	0	1	0	0	0	0	0	0	0	0	0	0
0	1	0	0	0	1	0	0	1	1	0	0	0	0	0	0	0	0
0	0	0	0	0	0	0	0	0	0	0	1	0	0	0	0	0	0
0	0	0	0	0	0	0	0	0	0	0	0	0	1	0	0	0	0
0	0	0	0	0	0	0	0	0	0	0	1	0	0	0	0	0	0
1	0	0	0	0	1	0	0	0	0	0	0	1	0	0	0	0	0
0	0	0	0	0	0	1	0	0	1	1	0	0	1	1	1	0	0
0	0	0	0	0	0	0	1	0	0	0	0	0	0	0	0	1	0
0	0	0	0	0	0	0	0	0	0	0	0	0	0	0	1	0	0
0	0	0	0	1	0	0	0	0	0	0	1	0	0	1	0	0	1
1	1	0	1	0	0	1	0	0	0	0	0	1	1	0	1	1	0
0	0	0	0	1	1	0	1	0	1	1	1	0	0	0	0	0	0
0	0	0	0	0	0	0	0	0	0	0	0	1	0	0	0	0	0
0	1	0	0	0	1	0	0	0	0	0	0	0	0	0	0	0	0
0	1	0	0	1	0	1	0	1	0	0	0	1	1	1	1	1	0
0	0	0	0	0	0	0	0	0	0	0	0	0	0	0	0	1	1
0	0	0	0	0	0	0	0	0	0	0	0	0	0	1	0	0	0
0	0	0	0	0	0	0	0	0	1	0	0	1	1	0	0	0	0
1	1	0	1	1	1	1	0	0	0	0	0	0	0	1	0	1	1
0	0	0	0	0	0	0	0	1	0	0	0	1	1	0	0	0	0
0	0	0	0	0	0	0	0	0	0	0	0	0	0	0	1	1	0
0	0	0	0	0	0	0	0	0	1	0	0	0	0	0	0	0	0
0	1	1	0	1	1	1	0	0	0	0	0	1	1	1	1	1	0
0	1	1	0	0	0	1	0	0	0	0	0	0	0	0	0	0	0
0	0	0	0	1	0	0	0	1	0	0	0	0	0	1	0	1	1
0	0	0	1	0	1	0	0	0	1	0	0	1	0	0	0	0	0
1	0	1	0	1	0	0	0	0	0	0	0	0	1	0	1	1	0
1	1	0	1	1	1	1	1	1	1	1	1	1	1	1	1	1	1
0	0	0	0	0	0	0	0	0	0	0	0	0	1	0	0	0	0
0	0	1	1	1	0	1	0	0	0	0	0	0	0	0	0	0	0
0	0	0	0	1	0	1	0	1	0	0	0	1	1	0	0	0	0
0	1	0	0	0	1	0	0	0	1	0	0	0	0	0	1	1	0
1	0	0	0	0	0	0	0	0	0	0	0	1	1	1	0	0	1
0	0	0	0	0	0	1	0	0	0	0	0	0	0	0	0	0	0
0	0	0	0	0	1	0	0	0	0	0	0	0	0	0	0	0	0
0	0	0	0	0	0	0	0	0	0	0	0	0	0	0	0	0	1
0	0	0	0	0	0	0	0	0	0	0	1	0	0	0	0	0	0
0	0	0	1	0	0	0	0	0	0	0	0	0	0	0	0	0	0
0	0	0	0	0	1	1	0	0	0	0	0	0	0	0	0	0	0
1	0	0	0	0	0	0	0	0	0	0	0	0	0	0	0	0	0
0	0	0	0	0	1	0	0	0	0	0	0	0	0	0	0	0	0
0	1	0	0	0	0	0	0	0	0	0	0	0	0	0	0	0	0
0	0	0	0	0	0	0	0	0	0	1	0	0	0	0	0	0	0
0	0	0	1	0	0	0	0	0	0	0	0	0	0	0	0	0	0
0	0	0	0	0	0	0	0	0	0	0	0	0	0	0	0	0	1
0	0	0	0	0	0	1	0	1	0	0	0	1	1	1	1	0	0
0	0	0	0	0	1	0	0	1	0	0	1	0	0	0	0	0	0
1	1	1	0	1	0	1	0	0	0	0	0	0	0	0	0	0	0
0	1	0	0	1	1	0	0	0	0	0	0	0	0	0	0	0	0
0	0	0	0	0	0	0	1	0	0	0	0	0	0	0	0	0	0
0	0	0	1	0	0	0	0	0	0	0	0	0	0	0	0	0	0
0	0	0	0	0	0	0	0	0	0	0	1	0	0	0	0	0	0
0	0	0	0	0	1	1	0	0	0	0	1	0	0	0	0	0	0
0	0	1	0	0	0	0	0	1	1	0	0	1	0	1	1	1	0
1	0	0	0	1	1	1	0	0	0	0	0	0	0	0	0	0	0
0	0	1	1	0	0	0	0	0	0	0	0	0	0	0	0	0	1
1	1	1	1	1	1	1	1	1	1	1	0	1	1	1	1	1	1
0	0	0	0	0	0	0	0	0	0	0	1	0	0	0	0	0	0
1	1	0	0	0	1	1	1	1	1	1	0	1	1	1	1	1	1
0	0	0	0	1	1	0	0	0	0	0	1	1	1	1	1	1	1
1	0	0	1	0	1	1	1	0	1	0	0	0	0	0	0	0	0
1	1	1	0	0	0	0	0	1	1	1	1	1	1	1	1	1	1
0	0	0	1	1	1	1	1	0	0	0	0	0	0	0	0	0	0
1	0	1	1	1	0	1	0	1	0	0	1	0	1	0	0	0	1
0	0	0	0	0	0	0	0	0	0	0	1	0	0	0	0	0	0
0	0	1	0	0	1	0	0	0	0	0	0	0	0	0	0	0	0
1	1	0	1	1	1	1	1	1	1	1	1	1	1	1	1	1	1
0	0	1	0	0	0	0	0	0	0	0	0	0	0	0	0	0	0
0	0	0	0	0	0	0	1	0	0	0	0	0	0	0	0	0	0
0	0	0	0	0	0	0	0	0	0	0	1	0	0	0	0	0	0
0	0	0	0	0	0	0	0	0	0	0	1	0	0	0	0	0	0
0	0	0	1	0	0	0	0	0	0	1	1	0	0	0	0	0	1
0	0	0	0	1	0	0	0	0	0	0	0	0	0	0	0	0	0
0	0	0	0	0	0	0	1	0	0	0	0	0	0	0	0	0	0
0	0	1	1	0	0	0	0	0	0	1	1	0	0	0	0	0	1
0	0	0	0	0	0	0	1	0	0	0	0	0	0	0	0	0	0
0	0	0	0	0	0	0	0	0	0	0	1	0	0	0	0	0	1
1	1	0	0	0	1	1	0	1	1	0	0	1	1	1	1	1	0
0	0	1	1	0	0	0	0	0	0	0	0	0	0	0	0	0	0
0	0	0	0	0	0	0	0	0	0	1	1	0	0	0	0	0	1
0	0	0	0	0	0	0	0	0	0	0	0	0	0	0	0	0	1
0	1	1	1	1	0	0	1	0	0	0	0	0	0	1	0	1	0
0	0	0	0	0	0	0	1	0	1	0	1	1	0	0	0	0	0
0	0	0	1	0	1	0	0	0	0	0	0	0	0	0	0	0	0
0	1	0	0	0	1	1	0	0	0	0	0	0	0	0	0	0	0
1	0	1	0	0	0	0	1	1	0	0	0	0	1	1	1	1	0
0	0	0	0	0	0	0	0	0	1	1	1	1	0	0	0	0	0
0	0	0	1	0	0	0	0	0	0	0	0	0	0	0	0	0	0
1	0	0	0	0	0	0	0	0	0	0	0	0	1	0	0	0	0
0	0	0	1	0	1	1	1	0	0	0	1	0	0	0	0	1	0
0	1	1	0	0	0	0	0	1	0	1	0	1	0	1	0	1	0
0	0	0	0	0	0	0	0	0	1	0	0	0	0	0	0	0	0
0	1	0	1	0	1	1	0	0	0	0	0	0	0	0	0	0	1
0	0	0	0	1	0	0	0	1	1	1	1	1	0	1	1	1	1
1	0	1	0	0	0	0	0	0	0	0	0	0	0	0	0	0	0
0	0	0	0	0	0	0	1	0	0	0	0	0	1	0	0	0	0
0	1	0	0	1	1	1	0	0	0	0	0	1	0	0	1	0	0
1	0	0	1	0	0	0	0	1	1	0	0	1	1	1	0	1	1
1	1	0	0	1	1	1	1	1	1	0	1	0	0	0	1	0	1
0	0	0	0	0	0	0	0	0	0	0	0	1	1	1	0	1	0
1	1	1	0	0	1	0	0	1	0	0	0	1	0	1	1	1	0
0	0	0	1	1	0	0	0	0	1	0	0	0	0	0	0	0	0
0	0	0	0	0	1	1	0	1	0	0	1	0	0	0	1	0	0
1	1	1	0	0	0	0	0	0	0	0	0	1	0	1	0	1	0
0	0	0	0	0	0	1	1	1	1	0	0	0	1	0	0	0	1
0	0	1	0	0	0	0	0	0	0	1	1	0	0	0	0	0	1
0	1	0	0	1	1	1	1	1	0	0	0	0	0	0	0	0	0
0	0	0	1	0	0	0	1	1	1	0	0	1	1	1	0	1	0
0	0	0	0	0	1	0	0	0	1	1	1	0	0	0	0	0	0
0	0	0	0	1	0	1	0	1	0	0	0	1	0	1	1	0	1
0	0	0	0	0	0	0	0	0	0	0	0	0	0	0	0	0	1
0	0	0	0	0	1	0	0	0	0	0	0	0	0	0	0	0	1
0	0	0	0	0	0	0	0	0	0	0	0	0	0	0	1	0	0
0	0	0	0	0	0	0	0	0	0	0	0	0	0	0	1	0	0
0	0	0	0	0	0	0	0	0	0	0	0	0	0	0	1	1	0
0	0	0	1	0	0	0	0	0	0	1	1	0	0	0	0	0	0
0	0	0	0	0	0	0	1	0	0	0	0	0	0	0	0	0	0
0	0	0	0	1	0	0	0	0	0	0	0	0	0	0	0	0	0
0	0	0	0	0	0	0	1	0	0	0	0	0	0	0	0	0	0
0	0	0	0	0	0	0	0	0	0	0	0	0	0	0	0	0	1
0	0	0	0	0	0	0	0	0	0	0	0	0	0	0	0	1	0
0	0	0	1	0	0	0	0	0	0	1	1	0	1	0	0	0	0
0	0	0	0	0	0	0	0	0	0	0	0	0	0	0	1	0	0
0	0	0	0	0	0	0	0	0	0	0	0	1	0	1	1	0	0
1	0	0	0	0	0	0	0	0	0	0	0	0	0	0	0	1	0
1	1	0	0	1	1	1	0	1	0	0	0	1	1	1	1	1	1
0	0	0	0	0	0	0	0	0	1	0	1	0	0	0	0	0	0
0	0	0	0	0	0	0	1	0	0	1	0	0	0	0	0	0	0
0	0	0	0	0	1	0	0	0	0	0	0	0	0	0	0	0	0
1	0	1	0	0	0	0	0	0	0	0	0	0	0	0	0	0	0
0	0	0	1	0	0	0	0	0	0	0	0	1	0	0	0	1	0
0	0	0	0	0	1	0	0	0	0	1	1	0	1	0	0	0	0
0	1	0	0	0	0	0	0	0	0	0	0	1	0	1	1	1	1
1	1	0	0	1	0	1	0	1	1	0	0	0	0	0	1	0	0
0	0	0	0	0	0	0	0	0	0	0	0	0	1	0	0	0	0
0	0	1	0	0	0	0	0	0	0	0	0	0	0	0	0	0	0
0	0	1	0	0	0	0	0	0	0	0	0	0	0	0	0	0	0
1	1	0	0	1	1	1	0	1	1	0	0	1	1	0	1	1	0
0	0	0	0	0	0	0	0	0	0	0	0	1	0	1	0	0	1
0	0	0	0	0	1	0	0	0	0	0	0	0	0	0	0	0	0
0	0	1	1	1	0	1	1	0	1	1	0	1	0	1	1	1	0
0	1	0	0	0	1	0	0	0	0	0	0	0	0	0	0	0	0
1	0	1	0	0	0	0	0	0	0	0	0	0	0	0	0	0	1
0	1	0	1	1	0	1	1	1	1	1	0	1	1	1	1	1	0
1	0	1	0	0	1	0	0	0	1	0	0	0	0	0	1	1	1
0	0	0	0	1	0	0	0	0	0	0	0	0	0	0	0	0	0
1	0	0	1	0	1	1	0	1	0	0	0	0	0	0	0	0	1
0	1	1	0	0	0	0	1	0	1	1	0	0	1	1	1	0	0
0	0	0	1	0	0	0	1	0	0	0	1	0	0	1	0	0	0
0	0	0	0	1	1	1	0	1	0	0	0	0	0	0	0	0	0
0	1	0	0	0	0	0	1	0	1	0	0	1	1	1	1	1	1
0	0	0	0	0	0	0	0	0	1	0	0	0	0	0	0	0	0
0	0	0	0	0	1	0	0	0	0	0	0	0	0	0	0	1	0
0	0	1	0	0	0	0	0	0	0	0	0	0	0	0	0	0	1
0	0	0	1	0	0	0	0	0	0	0	0	0	0	0	0	0	0
0	0	0	0	0	0	0	1	0	0	0	0	0	0	0	0	0	0
0	0	0	0	0	0	0	1	0	0	0	0	0	0	0	0	0	0
0	0	0	0	0	0	0	0	0	0	0	1	0	0	0	0	0	0
0	0	0	0	0	0	0	0	0	0	1	0	0	0	0	0	0	0
0	0	0	0	0	0	0	1	0	0	0	0	0	0	0	0	0	0
0	0	0	0	1	0	0	0	0	0	0	1	0	0	0	0	0	0
0	0	0	1	1	0	0	0	0	0	0	0	0	0	0	0	0	0
0	0	0	0	0	0	0	0	0	0	1	0	0	0	0	0	0	0
0	1	0	0	0	0	1	1	0	0	0	1	1	0	0	0	0	0
0	0	1	0	0	0	0	0	1	0	0	1	0	0	0	0	0	0
0	0	0	0	0	1	0	0	0	0	0	0	0	0	0	0	0	0
0	0	0	0	0	0	0	1	0	0	1	0	0	0	0	0	0	0
1	1	0	0	1	1	1	1	1	0	0	1	0	1	1	1	1	1
0	0	1	0	0	0	0	0	0	0	0	0	1	0	0	0	0	0
1	1	0	1	1	0	1	0	1	1	0	0	0	1	1	1	1	1
0	0	0	0	0	1	0	0	0	0	0	0	1	0	0	0	0	0
0	0	1	0	0	0	0	1	0	0	0	0	0	0	0	0	0	0
0	1	0	0	1	0	1	0	1	0	1	1	0	0	0	1	1	1
0	0	1	0	0	1	0	1	0	0	0	0	1	1	1	0	0	0
0	0	0	0	0	1	0	0	0	0	0	0	0	0	0	0	0	0
1	1	0	0	0	0	1	0	1	1	1	1	0	0	0	0	0	1
0	0	0	0	1	0	0	0	0	0	0	0	0	0	0	0	1	0
0	0	0	0	0	0	0	1	0	0	0	0	0	0	0	0	0	0
0	0	0	0	0	0	0	0	0	0	1	1	0	0	0	0	0	0
1	1	1	0	1	1	1	0	1	1	0	0	1	1	1	1	1	1
0	0	0	0	0	0	0	0	0	1	0	0	0	0	0	0	0	0

## Sheet: 0-1 (ISSR)
pom06 175	zap00 240	lbs05 170	lbs05 628	dos01 333	dos01 405	dos01 468	bes03 373	bes03 379	bes03 354	ora03 178	bie04 189	pod02 215	pod02 172	pod02 317	'Alicia'	'Limousine'	'Eska 46'
0	1	0	1	0	0	1	0	0	0	0	0	0	0	0	0	0	0
1	0	1	0	0	0	0	0	0	0	0	0	0	0	0	1	0	0
1	0	0	0	0	0	1	0	0	0	0	0	1	0	0	0	1	0
0	0	0	0	1	0	0	0	0	1	0	0	0	0	0	0	0	0
0	1	0	0	0	0	0	0	0	1	0	0	0	0	0	1	0	0
1	0	1	0	0	0	1	0	1	0	1	0	0	0	0	0	1	0
0	0	0	1	1	0	1	1	1	1	1	0	1	1	1	1	1	1
1	1	0	0	0	1	0	0	0	0	0	0	0	0	0	0	0	0
1	1	1	0	1	0	0	0	0	1	0	0	0	0	0	1	1	0
1	1	1	0	0	0	0	0	0	0	0	1	1	1	1	0	0	1
1	0	0	1	0	1	1	0	0	0	0	0	1	0	1	0	0	0
1	0	0	0	0	0	0	0	0	1	1	0	0	1	0	1	1	0
0	1	0	0	1	0	1	1	1	1	1	1	1	1	1	1	1	1
1	0	0	0	0	1	1	0	0	0	0	1	0	1	0	0	0	0
0	0	0	1	0	0	0	0	0	0	0	0	0	0	1	0	0	0
0	0	0	1	0	0	1	1	1	0	0	0	1	0	1	0	1	0
1	1	0	0	1	1	0	0	0	1	1	1	0	0	0	1	1	0
0	0	1	0	0	0	0	0	0	0	0	0	0	0	0	0	0	0
0	1	0	0	1	1	0	1	1	0	0	0	0	1	0	0	0	0
1	1	1	0	0	1	1	1	0	0	1	1	1	0	0	0	1	1
1	1	0	1	0	1	1	1	0	1	1	1	0	1	0	0	1	1
0	0	1	0	1	0	1	1	1	1	1	1	0	0	0	0	0	0
0	0	0	0	1	1	1	1	0	0	0	1	0	1	0	0	1	1
0	0	0	0	0	0	0	0	0	0	1	0	0	0	0	0	0	0
0	0	0	1	0	0	0	0	0	0	1	0	0	0	0	0	0	0
0	0	0	0	0	0	0	0	0	0	0	0	0	1	0	0	0	0
1	0	0	0	0	0	0	0	0	0	0	1	0	1	0	1	1	0
1	0	1	0	0	0	0	0	0	0	0	0	0	1	0	0	0	0
0	1	1	0	0	1	0	0	0	0	0	0	0	0	0	1	0	0
1	0	1	1	0	1	1	1	1	1	1	0	1	0	0	1	1	0
0	0	1	0	0	0	0	0	0	0	0	0	0	0	0	0	1	0
0	0	1	0	1	0	1	0	0	0	1	0	1	1	1	1	0	0
1	0	0	0	0	1	0	0	0	0	0	0	0	0	0	0	1	0
0	1	0	1	0	0	0	0	0	1	1	1	1	0	1	0	0	0
0	0	1	0	0	0	0	1	1	0	0	0	0	0	0	1	0	1
0	0	0	1	1	0	1	0	0	1	0	0	1	0	1	1	0	1
1	1	0	0	0	1	0	0	0	0	1	0	0	1	0	0	0	0
1	1	1	1	1	1	1	1	1	1	1	1	1	1	1	1	1	1
0	0	1	0	0	0	0	0	0	0	0	0	0	0	0	0	0	0
1	1	1	1	1	1	1	1	1	1	1	1	1	1	1	1	1	1
0	0	0	0	1	0	0	0	0	0	0	0	1	1	1	1	0	0
1	1	0	1	1	1	1	1	1	1	1	1	1	1	1	1	1	1
0	0	1	1	0	1	0	0	0	0	0	0	0	0	0	0	0	0
1	0	1	0	1	0	0	0	1	0	1	1	0	0	0	0	0	0
1	1	0	1	1	1	1	1	1	1	1	1	1	0	1	1	1	1
0	1	1	0	0	0	0	0	0	0	0	0	0	0	0	0	0	0
1	0	0	0	0	0	0	0	0	0	0	0	0	0	0	0	0	0
0	0	1	1	1	1	1	1	1	1	1	1	1	0	1	1	1	1
1	0	0	0	0	0	0	0	0	0	0	0	0	0	0	0	0	0
0	0	0	0	0	0	0	0	0	0	0	0	0	0	0	1	0	0
0	0	0	0	0	0	0	0	0	0	0	1	0	0	0	0	0	0
1	0	0	0	0	0	0	0	0	0	0	0	1	0	0	1	0	0
0	0	0	0	1	0	0	0	0	0	0	0	1	1	1	0	0	0
0	1	0	0	0	1	0	0	0	0	0	0	1	1	1	1	1	0
1	0	0	0	0	0	0	0	0	0	0	0	0	0	0	0	0	0
0	1	0	0	1	0	1	0	1	1	1	0	0	0	0	0	0	0
1	0	0	0	0	1	0	1	0	0	0	0	0	1	0	1	1	0
0	0	0	0	0	0	0	0	0	0	0	1	0	0	0	0	0	1
0	0	0	0	1	0	0	0	0	0	0	0	0	0	0	0	0	0
1	0	0	0	0	0	0	0	0	0	0	0	1	1	1	0	0	1
1	1	0	0	0	1	0	0	0	0	0	0	0	0	0	0	0	0
0	0	0	0	0	0	0	0	0	0	0	1	0	1	0	0	1	0
0	0	1	0	1	0	1	0	1	1	1	0	0	0	0	0	0	0
0	0	0	0	0	0	0	0	0	0	0	1	0	1	0	0	1	0
0	0	0	0	0	0	0	1	0	0	1	0	0	0	0	0	0	0
1	0	0	0	1	1	0	0	0	1	0	0	1	1	1	1	0	1
0	0	0	0	0	1	0	0	0	0	0	0	0	0	0	0	0	0
1	0	1	0	0	0	0	0	0	0	0	0	0	0	0	0	0	0
0	0	1	0	0	0	0	0	0	0	0	0	0	1	0	1	0	0
0	0	1	0	0	0	0	1	1	0	0	0	0	0	0	0	0	0
0	0	0	1	1	0	1	0	1	1	1	0	0	1	0	0	1	1
0	1	0	0	0	0	0	0	0	0	0	0	1	0	1	1	0	0
0	0	0	1	1	1	0	0	0	0	1	1	1	0	1	0	0	0
0	1	0	0	0	0	0	0	0	0	0	0	0	1	0	0	0	0
0	0	0	0	1	0	1	1	1	0	0	0	1	0	0	1	0	0
1	0	1	0	0	0	0	0	0	0	0	0	0	0	1	0	0	0
0	0	0	0	0	0	0	0	0	0	1	0	0	0	0	1	0	0
0	0	0	0	0	0	0	0	0	0	0	0	1	0	0	0	0	0
0	0	1	0	0	0	0	0	0	1	0	1	0	0	0	0	0	0
0	0	1	0	0	0	0	0	0	0	0	0	0	0	0	0	0	0
0	0	0	0	0	0	1	1	0	1	0	0	1	0	0	0	0	0
0	0	0	0	0	0	0	0	0	0	0	0	0	0	0	1	1	0
1	1	1	1	1	1	1	1	1	1	1	1	1	1	1	1	1	1
1	1	0	0	1	1	1	1	1	1	1	1	1	1	1	1	1	1
0	0	0	0	0	0	0	0	0	0	0	0	0	0	0	1	0	0
0	0	0	0	0	1	0	0	0	0	1	0	0	0	0	0	0	0
0	1	0	0	0	0	0	0	0	0	0	0	1	0	1	1	1	0
1	0	1	0	0	1	0	0	0	0	1	0	0	0	0	0	0	0
0	0	0	0	0	0	0	0	0	0	0	0	0	1	0	0	1	0
0	0	0	0	0	0	0	0	0	0	1	0	0	0	0	0	0	0
0	0	0	0	0	1	0	0	0	0	0	1	0	0	0	0	1	0
0	0	1	0	0	0	0	0	0	0	0	0	0	0	0	0	1	0
0	0	0	0	0	1	0	0	0	0	0	0	0	0	0	1	0	0
0	0	0	0	0	0	0	0	1	0	0	0	0	1	0	0	1	1
1	1	1	0	1	0	1	1	0	1	1	0	0	1	1	1	0	0
0	0	0	1	0	1	0	0	0	0	0	0	1	0	0	1	0	0
0	1	0	0	1	1	1	0	1	0	0	1	0	1	0	0	0	0
0	0	0	1	0	0	0	0	0	0	1	1	0	0	0	0	0	0
0	0	0	0	0	0	0	1	0	0	0	0	0	0	0	0	0	0
0	0	0	0	0	0	0	0	0	0	1	0	0	0	0	1	1	0
1	0	1	0	0	0	1	0	0	0	0	0	0	0	1	0	0	0
0	0	0	0	0	0	0	0	0	0	0	0	1	0	0	0	0	0
0	0	0	0	0	1	0	0	0	0	0	0	0	0	0	0	0	0
0	0	1	0	0	0	0	0	1	0	0	0	0	0	0	0	1	0
1	0	0	1	1	0	0	1	0	0	0	1	0	1	0	0	0	1
1	1	0	0	0	0	0	1	1	0	0	1	0	1	0	1	1	0
0	0	0	0	1	0	1	0	0	1	0	0	0	0	0	0	0	0
0	0	0	0	0	0	0	0	0	0	1	0	0	0	1	0	0	0
0	0	0	0	0	1	0	0	0	0	0	0	1	0	1	1	0	0
0	0	1	0	1	1	0	0	1	0	0	0	0	0	0	1	0	0
1	0	0	1	0	0	1	1	0	0	1	1	0	1	0	0	1	1
1	1	0	0	1	0	0	1	1	1	0	1	0	0	0	0	0	0
0	0	0	1	0	1	0	0	0	0	0	0	0	0	0	0	0	0
1	1	1	0	1	1	1	1	1	1	1	1	1	1	1	1	1	1
1	1	1	1	1	1	1	1	1	1	1	1	1	1	1	1	1	1
0	0	0	0	0	0	0	0	1	0	0	1	0	0	0	0	0	0
1	1	1	0	0	1	0	0	0	0	0	0	0	0	0	0	0	1
0	0	0	0	0	0	0	0	0	1	0	0	0	0	0	0	0	0
0	0	1	1	1	0	1	1	1	1	1	0	0	1	1	0	0	0
0	0	1	1	0	0	0	0	0	0	0	0	0	0	0	0	0	0
0	0	0	0	0	0	0	1	0	0	0	0	0	0	0	0	0	0
0	0	0	0	0	0	0	0	0	0	0	0	1	0	1	0	0	0
0	0	0	0	0	0	1	0	0	0	0	0	0	0	0	0	1	0
0	0	0	0	0	0	0	0	0	0	0	1	0	0	0	1	0	0
0	0	0	0	0	0	0	0	0	0	0	0	0	1	0	0	0	0
0	0	0	0	0	0	0	0	0	0	0	0	0	0	0	1	1	0
0	0	1	0	0	0	0	0	0	0	0	0	1	0	0	0	1	0
0	0	0	0	0	0	0	0	0	0	0	0	0	0	1	0	0	0
0	0	0	0	0	0	1	0	1	0	0	0	1	1	0	1	0	0
1	0	0	0	0	0	0	0	0	0	0	0	0	0	0	0	0	0
0	0	0	0	0	0	0	0	0	1	0	0	0	0	0	0	1	0
0	0	0	0	0	0	0	1	0	0	0	0	0	1	0	1	0	0
0	0	0	0	1	0	0	0	0	0	1	0	0	0	0	0	1	0
0	1	0	0	0	1	0	0	0	0	0	0	0	0	0	0	0	0
1	0	0	0	0	0	0	0	0	0	0	1	0	0	0	0	0	0
1	0	1	0	0	1	1	0	0	0	1	1	1	1	1	0	1	0
0	1	0	0	0	0	0	0	0	0	0	0	0	0	0	1	0	0
0	1	1	0	0	0	0	0	0	0	0	0	0	0	0	1	0	0
0	0	0	0	0	0	1	0	1	1	0	1	0	1	0	0	1	0
1	1	0	0	1	0	0	1	1	0	1	0	0	1	1	1	0	0
0	0	0	1	0	1	1	0	0	1	0	1	1	0	0	0	0	0
0	0	0	1	0	0	0	0	0	0	0	0	0	0	0	0	0	0
0	0	1	0	0	0	0	0	0	0	0	1	0	0	0	0	0	0
1	1	0	0	0	0	0	0	0	0	0	0	0	0	0	0	1	0
0	0	0	0	0	0	0	0	0	0	0	0	0	0	0	0	1	0
1	0	1	0	0	1	0	0	0	0	0	0	0	0	0	0	0	0
0	0	0	0	0	0	0	0	0	0	1	1	0	0	0	0	0	0
0	0	0	1	0	0	0	0	0	1	0	1	0	0	0	0	0	0
0	0	0	0	0	0	0	0	0	0	0	0	0	0	1	1	1	0
0	0	1	1	1	0	1	0	1	0	0	0	1	1	0	0	0	0
1	1	0	1	1	1	1	1	1	1	1	1	1	1	0	1	0	0
0	0	1	0	0	0	0	0	0	0	0	0	0	0	0	0	1	0
0	1	0	0	0	0	0	0	0	0	0	0	0	0	0	0	0	1
0	0	0	0	0	1	1	0	0	0	1	0	1	1	1	1	1	0
0	0	0	0	1	0	0	1	1	0	0	1	0	0	0	0	0	0
0	0	0	0	0	0	0	0	0	0	0	0	0	0	0	0	1	0
0	0	1	0	0	0	0	0	0	0	0	1	1	1	1	1	1	0
1	0	0	0	1	0	1	0	0	0	0	0	0	0	0	0	0	1
0	1	0	0	0	1	1	1	1	1	1	1	1	1	1	0	0	0
1	0	0	1	1	0	0	0	0	0	0	0	0	0	0	1	0	0
0	0	0	0	0	1	1	0	1	0	1	1	0	0	0	0	0	0
1	1	0	0	1	1	1	1	1	1	1	0	1	1	1	1	0	1
1	0	1	0	0	1	1	1	0	0	0	0	0	0	0	0	0	0
0	0	1	0	0	0	0	1	0	0	0	0	0	0	0	0	0	0
1	1	1	1	1	1	1	1	1	1	1	1	1	1	1	1	1	1
0	0	1	0	0	0	0	0	0	1	0	0	0	0	0	0	0	0
0	0	0	0	0	0	0	0	0	0	0	0	0	0	0	0	0	1
0	0	0	0	0	0	0	0	0	0	0	0	0	0	0	1	0	0
0	0	0	0	0	0	0	0	0	0	0	0	0	1	0	1	1	0
1	0	0	0	0	0	0	1	0	0	0	0	0	0	0	0	0	0
0	0	0	0	0	0	0	0	0	1	0	0	0	1	0	0	0	0
0	0	0	1	0	0	0	1	0	0	1	0	0	0	0	0	1	0
0	0	0	0	0	0	0	0	0	0	0	0	1	0	0	0	0	0
0	1	0	0	0	0	0	0	0	0	0	0	0	0	0	0	0	0
0	0	0	0	0	0	0	0	0	0	0	0	0	0	0	0	1	0
0	0	0	0	0	0	0	0	0	1	0	0	0	0	0	0	0	0
0	1	0	1	0	0	0	0	0	0	0	0	0	0	0	0	0	0
0	0	0	0	0	0	0	0	0	0	0	0	0	0	0	1	1	0
0	0	0	0	0	1	0	0	0	0	0	0	1	0	0	0	0	1
1	0	0	0	0	0	0	0	0	0	1	0	0	1	1	0	0	0
0	0	0	0	1	0	0	0	0	0	0	0	0	0	0	1	0	0
0	1	0	0	0	0	0	0	0	0	0	0	0	0	0	0	0	0
0	0	0	0	1	0	0	0	0	0	0	0	0	0	0	0	0	0
0	0	0	0	0	0	0	0	0	0	1	0	1	0	0	1	0	0
0	0	0	0	0	0	0	0	1	0	0	0	0	1	1	0	0	0
0	1	0	0	0	0	0	0	0	0	0	0	0	0	0	1	0	1
0	0	1	0	0	0	0	0	0	0	0	1	0	0	0	0	0	0
1	0	0	0	0	0	0	0	1	0	0	0	1	0	0	0	0	0
0	1	0	0	1	0	0	0	0	0	0	0	0	1	1	0	0	0
0	0	0	1	0	0	0	0	0	0	0	1	1	0	0	0	0	0
0	0	0	0	0	1	0	0	0	0	0	0	0	1	0	0	1	0
1	0	0	0	0	0	0	0	0	0	0	1	0	0	0	0	0	1
0	1	0	0	0	0	0	1	0	0	1	0	0	0	0	0	0	0
0	0	0	1	0	1	0	0	0	0	0	0	0	0	1	1	0	0
1	0	0	0	0	0	0	0	0	0	0	0	0	0	0	0	0	1
0	0	0	0	0	0	1	1	1	1	1	0	0	1	1	0	0	0
0	0	1	0	1	0	0	0	0	0	0	1	0	0	0	0	0	0
1	1	0	1	0	0	0	0	0	1	0	0	1	0	0	1	1	1
0	0	0	0	0	1	1	1	1	0	1	1	0	1	1	0	0	0
0	0	0	0	0	0	0	1	0	0	0	0	0	0	0	0	1	0
1	1	0	0	0	0	0	0	1	1	1	0	0	0	0	0	0	1
0	0	1	0	1	0	0	0	0	0	0	1	0	1	0	0	0	0
0	0	0	1	0	1	0	0	0	0	0	0	0	0	1	0	0	0
0	1	0	0	1	1	1	0	1	0	0	0	0	0	0	1	0	0
1	0	0	0	0	0	0	0	0	0	0	0	0	0	0	0	1	1
0	0	1	0	1	0	0	0	0	0	0	0	0	0	1	0	0	0
0	0	0	0	0	0	1	1	1	1	0	1	0	0	0	0	0	0
0	0	0	1	1	1	0	0	0	0	0	0	1	0	0	0	0	1
1	1	0	0	0	0	0	0	1	0	0	0	1	0	0	0	0	0
0	0	0	0	1	0	0	0	0	0	0	0	0	0	0	0	1	0
0	0	0	0	0	1	1	1	1	1	1	1	0	0	1	1	0	0
0	0	0	0	0	0	0	0	0	0	0	0	1	1	0	0	0	0
0	0	0	0	0	0	0	0	0	0	0	0	0	0	0	0	1	1
0	0	0	1	0	0	0	0	0	0	1	1	0	0	0	0	0	0
0	0	0	0	1	0	0	0	0	0	0	0	1	0	1	0	0	0
0	0	0	1	0	0	0	0	0	0	0	0	0	0	0	0	0	0
0	0	0	0	0	0	0	1	0	0	0	1	0	0	0	0	0	1
0	0	0	0	0	0	0	0	0	0	0	0	1	0	1	1	0	0
0	0	0	0	0	0	0	0	0	0	0	0	1	0	0	0	0	0
0	0	0	0	0	0	1	0	0	1	1	0	0	0	1	1	0	0
0	0	0	0	0	1	0	0	0	0	0	0	1	0	0	0	0	0
1	0	0	0	0	0	0	0	0	0	0	0	0	1	0	0	0	0
0	0	0	1	0	0	0	0	0	0	0	1	0	0	0	0	1	0
0	0	0	0	0	1	0	0	0	0	0	0	0	0	0	0	0	0
0	0	0	0	0	0	0	0	0	0	1	0	0	1	0	0	0	0
0	0	0	0	1	0	0	1	1	0	0	0	1	0	1	0	0	0
0	0	0	0	0	0	1	0	0	0	0	0	0	0	0	1	0	0
0	0	0	1	0	0	0	0	0	0	0	0	0	0	0	0	1	0
0	0	0	0	0	0	0	0	0	0	0	0	1	0	0	0	0	0
0	0	0	1	0	0	0	0	0	0	0	0	0	0	0	0	1	0
0	0	1	0	0	0	0	0	1	0	0	0	0	0	0	0	0	0
0	0	0	0	0	0	1	0	0	0	1	1	0	1	0	0	0	0
0	0	0	0	0	0	0	0	0	0	0	0	1	0	1	0	0	0
0	0	0	0	0	0	0	0	0	0	0	0	0	0	0	0	1	0
0	1	0	0	1	1	1	1	1	1	1	1	1	1	1	0	0	1
0	0	0	0	0	0	0	0	0	0	0	0	0	0	0	0	1	0
1	0	1	0	0	0	0	0	0	0	0	0	0	0	0	1	0	0
1	0	1	1	1	1	1	1	1	1	1	1	1	1	1	1	1	1
1	0	1	1	0	0	0	0	0	0	0	0	0	0	0	0	1	0
0	0	0	0	0	0	0	0	0	1	0	0	0	0	0	0	0	0
1	0	1	0	0	0	0	0	1	0	0	0	0	0	0	1	0	0
1	1	0	0	0	1	1	1	0	0	1	0	0	1	1	0	1	0
0	0	1	1	0	0	0	0	0	0	0	1	0	0	0	0	0	0
0	0	1	0	0	0	0	0	0	0	0	0	0	0	0	0	0	1
0	0	0	0	0	0	0	0	1	1	1	0	1	0	0	0	0	0
1	0	0	0	0	1	1	1	0	0	0	0	0	0	1	1	1	0
0	0	0	1	0	0	0	0	0	0	0	0	0	0	0	0	0	0
0	0	1	0	0	1	0	0	0	0	0	0	0	0	0	0	0	0
0	0	0	0	0	0	1	1	0	0	0	0	0	1	0	1	1	1
1	1	0	1	1	1	1	1	1	1	1	0	1	1	1	1	1	1
0	1	0	0	0	0	0	0	0	0	0	0	0	0	0	0	0	0
0	0	0	1	0	0	0	0	0	0	0	1	1	0	0	0	0	0
0	1	1	0	1	0	1	1	1	1	1	0	0	0	0	1	1	0
0	0	1	0	0	1	0	0	0	0	0	0	0	0	0	0	0	0
0	0	0	1	0	0	0	1	1	0	0	0	0	0	0	0	0	1
0	1	0	0	0	0	0	0	0	0	0	0	0	0	0	0	0	0
0	0	0	0	0	0	0	0	0	0	0	1	0	0	0	0	0	0
0	0	0	1	0	0	0	0	0	0	0	0	0	0	0	0	0	0
1	0	0	0	1	0	0	0	0	0	0	1	0	0	0	0	0	0
0	0	0	0	0	0	0	0	0	0	0	0	1	0	1	0	1	0
1	0	0	0	0	0	0	0	0	0	0	0	0	0	0	0	0	0
0	0	0	0	1	0	0	0	0	0	0	0	0	0	0	1	0	0
0	0	0	0	0	1	0	0	0	0	0	0	0	0	0	0	0	0
0	0	0	0	1	0	0	1	1	1	0	0	1	1	1	0	0	0
0	0	0	0	0	0	0	0	0	0	0	1	0	0	0	1	1	0
1	1	1	1	0	1	1	0	1	1	1	0	0	1	0	0	0	0
0	0	0	0	0	1	0	0	0	0	0	0	0	0	0	1	0	0
0	1	1	0	0	1	1	1	1	0	1	1	0	0	0	0	0	0
0	0	0	0	1	0	0	0	0	0	0	0	1	0	1	1	0	1
0	0	1	0	0	0	0	0	0	0	0	0	0	0	0	0	0	0
1	1	0	0	0	0	0	0	0	0	0	0	0	0	0	0	0	0
0	0	1	0	0	0	0	0	0	0	0	0	0	0	0	0	0	0
0	0	1	0	0	0	1	1	1	1	1	1	1	1	0	0	0	0
0	1	0	0	1	0	1	0	0	0	0	0	0	0	1	1	1	1
1	0	0	1	1	0	0	1	1	0	1	0	1	1	0	1	0	0
0	1	1	0	0	1	0	0	0	1	0	0	0	0	1	0	1	0
0	0	0	0	0	0	0	0	0	0	0	0	0	0	0	0	0	1
1	0	1	1	0	1	0	0	0	0	0	0	0	0	0	0	0	0
0	1	0	0	0	0	0	0	0	1	0	1	0	0	0	0	0	0
1	0	0	0	1	0	1	1	1	0	1	0	1	1	1	1	1	1
0	0	0	1	0	0	0	0	0	0	0	0	0	0	0	0	0	0
0	0	0	0	1	0	1	1	1	0	1	1	0	0	0	1	0	0
0	0	1	0	0	1	0	1	0	1	0	0	0	1	0	0	0	1
1	1	0	0	0	0	0	0	0	0	0	0	0	0	0	0	1	1
0	0	1	0	1	1	0	1	1	0	0	0	0	0	0	0	0	0
0	1	0	0	0	0	0	0	0	0	0	0	0	1	0	0	0	0
0	0	1	1	0	0	0	0	0	0	0	0	0	0	0	0	0	0
0	0	0	0	0	0	0	0	0	1	0	0	1	0	1	0	1	0
0	0	0	0	1	0	0	1	0	0	0	1	0	0	0	0	0	0
0	0	1	0	0	0	0	0	0	0	0	0	0	1	0	0	0	0
1	0	0	0	0	0	1	0	0	0	1	1	0	0	0	0	0	0
0	0	0	0	0	0	0	0	0	0	0	0	0	0	0	0	0	1
0	1	0	0	0	0	0	0	0	0	0	0	0	0	0	0	0	0
0	0	0	0	0	0	0	0	0	0	0	0	1	0	0	0	0	0
0	0	0	0	0	0	0	0	0	0	0	0	0	1	0	0	0	0
0	1	1	0	0	0	0	0	0	0	0	0	0	0	0	0	0	0
0	0	0	0	0	0	0	0	0	0	0	0	0	0	0	0	1	0
0	0	0	0	0	0	0	0	0	0	0	1	0	0	0	1	0	0
0	1	0	0	0	0	0	0	0	0	0	0	1	1	0	0	0	0
0	0	0	0	0	0	1	0	0	0	0	0	1	0	0	0	0	0
1	0	0	0	0	0	0	0	0	0	0	0	0	0	0	0	0	0
0	0	0	0	0	0	0	0	0	0	0	0	0	1	0	0	0	0
0	1	0	0	0	1	0	0	0	0	0	0	0	0	0	0	0	0
1	0	0	0	1	0	0	1	0	1	1	0	0	0	0	0	0	0
0	0	0	0	0	1	1	0	0	0	0	0	1	1	1	1	1	0
0	0	0	0	0	0	0	0	1	0	0	0	0	0	0	0	0	0
0	0	0	0	1	0	0	1	0	0	1	0	0	0	0	0	0	0
0	1	0	1	0	0	0	0	0	0	0	0	0	0	0	0	1	0
0	0	0	0	0	0	0	0	0	0	0	0	0	1	0	0	0	0
1	0	0	0	0	0	0	1	1	0	0	0	0	0	0	0	0	0
0	0	0	0	1	0	0	0	0	1	0	0	0	0	0	0	0	0
0	1	1	0	0	0	1	0	0	0	0	1	1	1	1	1	1	1
0	0	0	1	0	0	0	0	0	0	0	0	0	0	0	0	0	0
1	0	0	0	1	1	1	0	1	1	1	0	0	1	0	1	0	0
0	0	0	0	0	0	0	0	0	0	0	0	0	0	0	0	1	0
0	0	1	0	1	0	1	1	1	1	1	0	0	1	0	1	1	0
1	1	1	0	0	0	0	0	0	0	0	0	0	0	1	0	0	0
0	0	0	0	0	0	0	0	0	0	1	0	0	0	0	0	0	0
0	0	0	0	0	1	0	0	0	1	0	1	0	1	0	1	0	1
1	1	0	0	1	0	1	1	1	1	1	0	1	0	1	1	1	1
0	0	0	0	0	0	0	0	0	0	0	0	0	1	0	0	0	0
0	0	1	0	1	1	1	0	0	0	0	1	0	0	0	0	0	0
0	0	0	0	0	0	1	0	0	1	0	0	0	0	0	1	0	1
0	0	0	0	0	1	0	0	0	0	0	0	0	0	0	0	0	0
0	1	1	1	1	0	1	1	1	1	1	0	0	0	0	0	0	0
0	0	0	0	0	0	0	0	0	0	0	0	1	1	1	1	0	1
0	0	1	0	0	1	0	0	0	0	0	0	0	0	0	0	0	0
1	1	1	0	1	1	1	1	1	1	1	1	1	1	1	1	1	1
1	0	0	0	0	0	0	0	0	0	0	1	0	0	0	0	0	0
0	0	0	0	0	0	0	0	0	0	0	0	1	0	0	1	0	0
0	0	0	0	0	0	0	0	0	0	0	0	0	0	0	0	1	0
0	0	0	0	0	0	0	0	0	0	0	0	0	0	0	1	0	0
1	0	0	0	0	0	0	1	0	0	0	0	0	0	0	0	0	0
0	1	0	0	0	0	1	0	0	0	0	0	0	1	0	1	0	0
0	0	0	0	0	0	0	0	0	1	0	0	1	0	0	0	0	0
0	0	0	0	0	0	0	0	0	0	0	1	0	0	0	0	0	0
1	0	0	0	0	0	0	1	0	0	0	0	0	0	0	0	0	0
0	0	1	0	0	0	0	0	0	0	0	0	0	0	1	0	1	0
0	1	0	0	0	0	1	0	0	0	0	0	0	1	0	1	0	0
0	0	0	0	0	1	0	0	0	0	0	1	0	0	0	0	0	0
0	0	0	1	0	0	0	0	0	0	0	0	0	0	0	0	0	0
1	1	0	1	1	1	1	1	1	1	1	0	1	0	1	0	1	1
0	0	1	0	0	0	0	1	0	0	0	0	0	1	0	0	1	1
1	0	0	0	0	1	0	0	0	0	1	0	0	1	0	0	0	0
0	0	0	0	0	0	0	0	0	1	0	0	0	0	0	0	0	0
0	0	0	0	0	0	0	0	0	0	0	0	0	0	0	0	1	0
0	0	0	0	0	0	1	0	1	0	0	0	0	0	0	0	0	0
0	0	0	0	0	0	0	0	0	0	0	0	0	1	0	1	0	0
0	0	0	0	0	0	0	0	0	0	1	0	1	0	0	0	1	0
1	0	0	1	0	1	0	0	0	1	0	0	0	0	0	0	0	0
1	0	1	0	0	0	1	0	0	1	0	0	0	1	0	1	1	0
0	0	0	0	0	0	0	0	0	0	1	0	1	0	1	0	0	1
0	0	0	0	0	0	0	0	0	0	1	0	1	0	1	0	0	1
0	0	0	0	1	1	0	0	0	0	0	0	0	0	0	0	0	0
0	1	0	0	0	0	0	1	1	0	0	1	0	0	0	0	0	1
1	0	0	0	0	0	0	0	1	0	0	0	0	0	0	0	0	0
0	1	1	1	1	0	1	1	0	0	0	0	0	0	1	1	1	1
1	0	0	0	0	0	0	0	0	0	0	0	0	0	0	0	0	0
0	0	1	0	0	0	0	0	0	0	0	0	1	1	1	1	1	1
0	0	0	1	1	1	1	0	1	0	0	0	0	0	0	0	0	0
0	0	0	0	0	0	0	1	0	0	1	0	1	0	1	0	0	1
1	1	0	0	1	1	1	1	1	1	1	0	0	0	0	0	0	1
0	0	0	0	0	0	0	0	0	0	0	0	1	1	1	1	1	0
0	0	0	1	0	0	0	0	0	0	0	0	0	0	0	0	0	0
1	0	1	0	0	0	0	0	0	0	0	0	1	1	0	0	0	0
0	0	0	0	0	1	0	1	0	1	1	0	0	0	0	1	0	1
0	1	1	1	0	0	0	0	0	0	0	0	0	0	0	0	0	0
0	0	0	0	1	0	1	1	1	0	0	0	0	0	0	0	0	0
1	0	0	0	0	1	0	0	0	1	0	0	0	1	0	1	1	0
0	0	1	0	0	0	1	1	0	0	0	1	1	0	0	0	0	1
0	0	0	0	0	0	0	0	0	0	0	0	0	0	1	1	0	0
0	0	0	1	0	0	0	0	0	0	0	0	0	0	0	0	0	1
0	1	1	0	0	1	1	1	0	1	0	1	1	0	0	0	0	0
1	0	0	0	1	0	0	0	0	0	0	0	0	1	1	0	0	1
0	0	1	0	0	0	0	0	0	0	0	0	0	0	0	1	0	0
0	0	1	0	0	0	0	0	0	0	0	0	0	0	0	0	0	0
0	0	0	0	0	0	0	0	0	0	0	0	0	0	0	0	1	0
0	0	0	0	0	1	0	0	0	0	0	0	0	0	0	0	0	0
0	0	0	0	1	0	0	0	0	0	0	0	0	0	0	0	0	0
0	0	1	0	0	0	0	0	0	0	0	0	0	0	0	0	0	0
0	0	0	0	0	0	0	0	0	0	0	0	0	1	0	0	0	0
0	0	0	0	1	0	0	0	0	0	0	0	1	0	0	0	0	0
0	0	0	0	0	0	0	0	0	0	0	0	0	0	0	1	0	0
0	0	0	1	0	0	0	0	0	1	1	0	1	0	1	0	1	0
0	0	0	0	1	0	0	0	0	0	0	1	0	0	0	0	0	0
0	0	0	0	0	1	0	0	0	0	0	0	0	0	0	0	0	0
0	0	0	0	0	0	0	0	0	0	0	1	0	0	0	0	0	0
0	0	0	0	0	0	0	0	0	0	0	0	0	1	0	1	0	1
0	0	0	0	0	0	0	0	1	1	1	0	1	0	1	0	1	0
0	1	0	0	1	0	1	0	0	0	0	0	0	0	0	1	0	0
0	0	0	0	0	0	0	0	1	0	0	0	0	0	0	0	0	0
0	0	0	0	0	0	0	0	0	0	0	1	0	0	0	0	0	0
0	1	0	1	0	0	0	0	0	0	1	0	0	0	0	0	0	0
0	0	1	0	0	0	0	0	0	0	0	0	0	0	0	0	0	0
0	0	0	0	0	0	0	1	1	1	0	0	1	0	1	0	0	1
0	0	1	0	0	0	0	0	0	1	0	0	0	0	0	0	1	0
0	0	0	0	0	0	0	0	0	0	0	0	0	0	0	0	0	1
0	0	0	1	0	1	0	0	1	0	0	1	0	0	0	0	0	0
0	0	0	0	0	0	0	1	0	0	1	0	0	0	0	0	0	0
0	0	0	0	0	0	0	0	1	1	0	1	0	0	0	0	1	0
0	0	0	0	0	0	0	0	0	0	0	0	1	0	1	1	1	0
0	0	0	0	0	1	1	0	0	0	0	0	0	1	0	0	0	0
1	1	0	1	1	1	0	1	0	1	0	0	0	0	1	0	0	0
0	0	0	0	0	0	1	0	0	0	1	1	0	0	0	0	1	0
0	0	1	0	1	0	0	0	0	0	0	0	0	0	0	0	0	0
0	0	0	0	0	0	0	0	0	0	0	0	0	0	0	0	0	1
1	1	0	0	1	1	1	0	1	0	1	0	1	1	1	1	1	1
0	0	1	0	0	0	0	1	0	1	0	1	0	0	0	0	0	0
0	1	0	0	0	0	0	0	0	1	0	0	0	0	0	1	0	0
0	0	1	0	0	0	1	1	0	0	0	0	0	0	0	0	0	0
0	0	0	0	1	0	0	0	0	1	1	0	0	0	0	0	1	0
0	0	1	0	0	0	1	0	1	0	0	0	0	0	0	0	0	1
1	1	0	0	0	1	0	1	0	0	0	0	0	0	0	0	0	0
0	0	0	0	0	0	0	1	0	0	0	0	0	1	0	0	0	1
1	1	1	1	1	1	1	1	1	1	1	1	1	1	1	1	1	1
0	0	0	0	0	0	0	0	0	0	1	0	0	0	0	0	0	0
0	0	1	0	1	1	1	0	1	1	1	0	0	1	0	1	1	1
0	0	1	0	0	0	0	1	1	0	0	0	0	0	0	0	0	0
0	0	0	1	0	0	0	0	0	0	0	0	0	0	0	0	0	0
0	0	1	0	0	0	0	0	0	0	0	0	0	0	0	0	0	0
0	0	0	0	0	0	0	1	0	0	0	0	0	0	0	0	0	0
0	0	0	0	0	0	0	0	0	0	0	1	0	0	0	0	0	0
0	0	0	0	0	0	0	0	0	0	0	1	0	0	0	0	0	0
0	1	0	0	0	0	0	0	0	0	0	0	0	0	0	0	1	0
1	0	0	0	0	0	0	0	0	0	0	0	0	0	0	0	0	0
0	0	0	0	0	1	0	0	0	0	0	0	1	1	1	0	0	0
0	0	0	1	0	0	0	0	0	0	0	0	0	0	0	0	0	0
1	0	0	0	0	0	0	1	0	0	0	0	1	0	1	1	0	0
0	0	0	0	0	1	0	0	0	0	0	1	0	0	0	0	0	0
0	0	1	0	0	0	0	0	0	0	0	0	0	0	0	0	0	0
0	0	0	1	0	0	0	0	0	0	0	0	0	0	0	1	0	0
0	0	0	0	0	0	0	1	0	0	1	0	1	0	1	0	0	0
0	0	0	0	0	0	1	0	0	0	0	0	0	0	0	0	0	0
0	0	0	0	0	0	0	0	0	0	0	0	0	1	0	0	0	0
0	0	0	0	1	1	0	1	1	1	0	0	0	0	1	0	0	0
1	1	0	0	0	0	1	0	0	0	0	0	1	0	0	0	1	0
0	0	0	0	0	0	0	0	0	0	0	1	0	1	0	0	0	0
0	0	0	0	0	0	0	0	0	0	0	0	0	0	0	1	0	0
0	0	0	0	0	0	0	0	0	0	0	0	1	0	0	0	0	0
0	0	0	0	0	0	0	0	0	0	0	0	0	0	1	0	0	0
0	0	0	0	0	0	0	0	0	0	0	0	0	0	0	1	0	0
1	0	1	0	0	0	0	0	0	1	0	1	1	1	1	0	1	0
0	1	0	0	1	0	1	1	1	0	1	0	0	0	0	0	0	0
0	0	0	1	0	0	0	0	0	0	0	0	0	0	0	0	0	0
1	1	1	0	1	1	1	1	1	1	1	1	1	1	1	1	1	1
0	0	0	0	0	0	0	0	0	0	0	0	0	0	0	0	0	1
1	0	0	0	0	0	0	0	0	0	0	0	0	0	0	0	0	0
0	0	0	0	0	0	0	0	0	1	0	1	0	0	0	1	1	0
0	0	1	0	0	0	0	0	1	0	0	0	0	0	0	0	0	0
1	1	0	0	0	0	1	0	0	0	0	0	0	0	0	0	0	0
1	0	0	0	0	0	0	0	0	0	0	0	0	0	0	0	0	1
0	1	0	0	0	0	0	0	0	0	0	0	0	0	1	0	0	0
0	0	0	1	1	1	1	0	0	0	0	0	0	1	0	1	0	0
0	0	0	0	0	0	0	1	1	1	1	0	0	0	0	0	0	1
0	1	0	0	0	0	0	0	0	0	0	0	0	0	0	0	1	0
1	0	1	1	1	1	1	1	1	1	1	1	1	1	1	1	0	0
1	1	0	0	0	0	0	0	0	0	0	0	0	0	0	0	0	0
0	0	0	1	1	1	1	1	1	1	0	0	1	1	1	0	0	1
0	0	1	0	0	0	0	0	0	0	0	0	0	0	0	0	0	0
1	1	0	0	0	0	0	0	0	0	0	0	0	0	0	0	0	1
0	0	0	1	0	1	0	0	0	0	0	1	0	0	0	0	0	0
0	0	1	0	1	0	0	0	1	1	0	1	0	1	1	0	0	0
0	0	0	1	0	0	0	0	0	0	0	0	0	0	0	0	0	0
0	0	0	0	0	0	0	0	0	0	0	1	0	0	0	0	1	0
0	0	0	0	0	0	0	0	0	0	0	0	0	0	0	1	0	0
0	0	0	0	0	0	0	0	0	0	0	0	0	0	0	0	1	0
0	0	0	0	0	0	0	0	0	0	0	0	0	0	0	1	0	0
0	0	0	0	0	0	0	0	0	0	0	0	0	0	0	1	1	0
0	0	1	0	0	0	0	0	0	0	0	0	0	0	0	0	0	0
0	0	1	0	0	0	0	0	1	0	0	1	0	0	0	0	0	0
0	0	0	1	0	0	0	1	0	0	0	0	0	1	0	0	0	0
0	0	0	0	0	0	0	0	0	0	1	0	0	0	0	0	1	0
0	0	0	0	0	0	0	0	0	0	0	0	1	0	1	0	0	0
0	0	0	0	0	0	0	0	0	0	0	0	0	0	0	1	0	0
0	0	1	1	0	0	0	0	0	0	0	0	0	0	0	0	0	0
0	0	0	0	1	0	1	1	1	0	0	0	1	0	0	0	0	0
1	1	0	0	0	1	0	0	0	1	0	0	0	1	1	1	0	0
0	0	0	0	0	0	0	0	0	0	0	0	1	0	1	0	1	0
1	0	0	0	0	0	0	0	0	0	0	0	0	0	0	0	0	0
0	0	1	1	0	0	0	1	0	0	0	1	0	0	0	0	0	0
0	0	0	0	0	0	0	0	0	0	1	0	1	0	0	0	0	0
0	0	0	0	1	1	0	0	1	0	0	0	0	0	0	1	0	0
1	0	0	1	0	0	0	0	0	0	0	1	0	0	0	0	0	0
0	0	1	0	0	0	0	0	0	0	0	0	0	0	0	0	0	0
0	1	0	0	0	0	0	0	0	1	0	0	0	0	1	0	1	0
0	0	1	0	1	0	0	0	0	0	0	0	0	0	0	0	0	0
1	1	0	0	0	1	1	1	1	0	0	0	0	1	1	0	0	0
0	0	0	0	0	0	0	0	0	1	0	1	1	0	1	0	0	1
0	0	0	0	0	0	0	0	0	0	0	1	0	0	0	0	0	0
0	0	1	1	0	0	0	1	0	0	1	0	0	0	0	0	0	0
1	0	0	0	0	0	1	0	0	1	0	0	1	0	0	0	0	0
0	0	0	0	1	1	0	0	1	0	0	0	0	1	0	1	1	0
1	1	0	0	0	0	0	0	0	0	1	1	1	0	1	0	0	1
1	0	0	1	0	0	0	0	0	0	0	0	0	0	0	0	0	0
0	0	1	0	0	0	0	0	0	0	0	0	0	0	0	0	0	0
0	1	0	1	1	1	1	1	1	1	1	0	1	0	1	0	0	0
1	0	1	0	0	0	0	0	0	0	0	1	0	1	0	1	1	0
0	0	0	0	0	1	0	0	0	0	0	0	0	0	0	0	0	0
0	0	0	0	1	0	0	0	1	0	0	0	1	0	1	1	0	1
0	0	1	0	0	0	1	0	0	0	0	0	0	0	0	0	1	0
0	1	0	0	0	0	0	0	1	0	0	0	0	0	0	0	0	0
0	0	0	1	0	0	0	0	0	0	0	0	0	0	0	0	0	0
0	0	0	0	0	1	0	0	0	1	0	0	0	0	0	0	0	0
0	0	0	1	0	0	0	1	1	0	1	0	0	1	0	0	0	0
0	0	0	0	0	0	0	0	0	1	0	0	1	0	1	1	0	0
0	0	0	0	0	0	0	0	0	0	0	0	0	0	0	0	0	1
0	0	1	0	0	1	0	0	0	0	0	0	0	0	0	0	0	0
0	0	0	1	0	0	1	0	0	0	0	1	1	1	1	1	0	0
0	0	0	0	0	0	0	1	0	0	0	1	0	0	0	0	0	1
0	0	1	0	0	0	0	0	0	0	0	0	0	0	0	0	0	0
0	0	0	0	0	0	0	0	0	0	0	0	0	0	1	0	0	0
0	0	0	1	0	0	0	0	0	0	0	0	0	0	0	0	0	1
0	0	0	0	0	0	1	1	0	0	0	0	0	0	1	0	0	0
0	0	0	0	0	0	0	0	0	0	0	0	0	0	0	0	0	1

## Sheet: 0-1 (RAPD)
pom06 175	zap00 240	lbs05 170	lbs05 628	dos01 333	dos01 405	dos01 468	bes03 373	bes03 379	bes03 354	ora03 178	bie04 189	pod02 215	pod02 172	pod02 317	'Alicia'	'Limousine'	'Eska 46'
0	0	0	1	0	0	0	0	0	0	0	0	0	0	0	0	0	0
0	0	0	1	0	0	0	0	0	0	0	0	0	0	0	0	0	0
0	0	0	0	0	0	0	0	0	0	0	1	0	0	0	0	0	0
0	0	0	0	1	1	0	0	0	1	0	0	1	0	1	1	1	0
1	0	0	0	0	0	0	0	0	0	0	0	0	1	0	0	0	0
0	0	0	0	0	1	0	0	0	0	0	0	0	0	0	1	0	0
1	1	0	0	0	0	0	0	0	0	0	0	0	0	0	0	0	0
0	0	0	0	0	0	0	0	0	0	0	1	0	0	0	0	0	0
0	0	0	1	0	0	0	0	0	0	0	0	0	0	0	0	0	0
0	0	0	1	0	0	0	0	0	0	0	0	0	0	0	0	0	0
0	0	0	0	0	0	1	0	0	0	0	0	0	0	0	0	0	0
0	0	0	0	1	1	0	0	0	1	0	0	1	1	1	1	1	0
1	1	0	0	0	0	0	0	0	0	0	0	0	0	0	0	0	0
1	1	1	1	1	1	1	0	0	1	0	0	1	1	1	1	1	0
0	0	0	0	0	0	0	1	0	0	0	0	0	0	0	0	0	0
0	1	0	0	1	0	0	0	0	0	0	0	0	0	0	1	0	0
0	0	0	0	0	1	1	0	0	1	1	0	0	0	0	0	0	0
0	1	1	0	0	0	0	1	0	0	0	0	0	1	0	0	0	0
0	0	0	1	0	0	0	0	0	0	1	1	0	0	0	0	0	0
0	1	0	0	0	1	1	0	0	1	0	1	0	1	0	0	0	0
0	0	1	1	0	0	1	1	1	1	0	0	1	0	0	1	1	0
0	0	1	0	0	1	0	0	0	0	1	0	0	0	0	0	0	0
1	1	0	0	1	0	1	0	0	1	0	0	1	1	1	0	0	0
0	0	1	0	0	0	0	0	0	0	0	0	0	0	0	0	0	0
0	0	0	1	0	0	0	1	0	0	0	0	1	0	1	0	0	0
1	1	1	0	1	1	1	1	1	1	1	1	1	1	1	1	1	1
0	1	0	1	1	0	1	1	0	1	0	1	1	1	1	1	0	0
0	1	1	0	1	0	0	0	0	1	1	0	1	1	1	0	0	0
0	0	0	0	0	0	0	0	0	0	0	0	0	0	0	0	0	1
0	0	0	0	0	0	1	1	1	0	1	0	0	0	0	1	0	0
1	0	0	1	0	0	0	0	0	0	0	1	0	0	0	0	0	0
1	0	0	1	0	0	1	0	0	0	0	0	0	0	0	0	0	0
0	0	0	0	0	0	0	1	1	0	0	1	0	0	0	1	0	0
1	0	0	1	0	0	0	0	1	0	0	0	0	0	0	0	0	1
0	1	0	0	0	0	0	0	0	0	0	0	0	0	0	0	0	0
0	0	0	1	0	0	0	0	0	0	0	0	0	0	0	0	0	0
1	0	0	0	0	0	0	0	0	0	0	0	0	0	0	0	0	0
1	1	0	1	1	1	1	1	1	1	1	1	1	1	1	1	1	1
0	0	0	0	0	0	0	1	0	0	0	0	0	0	0	0	0	0
0	0	0	0	0	0	0	0	0	0	1	0	0	0	0	0	0	0
0	0	0	0	0	0	0	0	0	0	0	1	1	0	1	0	0	0
0	0	0	0	0	0	0	1	0	0	0	0	0	0	0	0	0	0
1	1	1	0	0	1	1	0	0	0	0	0	0	0	0	0	0	1
0	0	0	1	0	0	0	0	1	0	0	1	0	1	1	1	1	0
0	0	0	0	0	0	0	1	0	0	0	0	0	0	0	1	1	0
0	0	0	0	1	0	0	0	0	0	0	0	0	1	1	0	0	0
0	0	0	0	0	0	0	0	0	1	0	0	1	0	0	0	0	0
0	0	1	0	1	1	0	0	0	0	0	0	0	0	0	1	1	0
0	0	0	0	1	0	0	0	1	0	0	0	0	0	0	0	1	0
0	0	0	0	0	0	0	1	0	0	0	0	1	1	1	0	0	0
1	1	1	0	1	1	1	0	1	0	0	0	1	0	1	0	0	0
0	0	0	0	0	0	0	0	0	0	0	0	0	1	0	1	1	0
0	0	0	0	0	1	1	1	1	0	0	0	0	0	0	0	0	0
1	1	1	0	0	0	0	0	0	0	0	0	1	0	1	0	0	0
0	0	0	0	0	0	0	1	0	0	0	1	0	0	0	0	0	0
0	0	0	1	0	0	0	0	1	0	0	0	1	0	0	1	0	0
1	1	0	0	1	1	1	1	1	1	1	0	0	0	0	0	0	1
1	1	1	0	0	1	0	0	0	0	0	1	1	1	1	1	1	0
0	0	0	0	0	0	0	0	1	0	0	0	0	1	1	1	0	1
0	0	0	0	0	0	0	1	0	0	0	0	0	0	0	0	0	0
0	0	1	1	0	0	0	0	0	0	1	1	0	0	0	0	0	1
0	1	1	0	0	0	1	0	1	1	1	0	0	0	0	0	0	0
0	0	0	1	0	0	0	0	0	0	0	0	1	1	1	0	1	1
0	1	0	0	0	1	0	0	1	1	0	0	0	0	0	0	0	0
1	0	0	0	0	0	0	0	0	0	0	0	0	0	0	0	0	1
0	0	0	0	0	0	0	1	0	0	0	0	0	0	0	0	0	0
0	1	0	0	0	1	0	0	1	1	0	0	0	0	0	0	0	0
0	0	0	0	0	0	0	0	0	0	0	1	0	0	0	0	0	0
0	0	0	0	0	0	0	0	0	0	0	0	0	1	0	0	0	0
0	0	0	0	0	0	0	0	0	0	0	1	0	0	0	0	0	0
1	0	0	0	0	1	0	0	0	0	0	0	1	0	0	0	0	0
0	0	0	0	0	0	1	0	0	1	1	0	0	1	1	1	0	0
0	0	0	0	0	0	0	1	0	0	0	0	0	0	0	0	1	0
0	0	0	0	0	0	0	0	0	0	0	0	0	0	0	1	0	0
0	0	0	0	1	0	0	0	0	0	0	1	0	0	1	0	0	1
1	1	0	1	0	0	1	0	0	0	0	0	1	1	0	1	1	0
0	0	0	0	1	1	0	1	0	1	1	1	0	0	0	0	0	0
0	0	0	0	0	0	0	0	0	0	0	0	1	0	0	0	0	0
0	1	0	0	0	1	0	0	0	0	0	0	0	0	0	0	0	0
0	1	0	0	1	0	1	0	1	0	0	0	1	1	1	1	1	0
0	0	0	0	0	0	0	0	0	0	0	0	0	0	0	0	1	1
0	0	0	0	0	0	0	0	0	0	0	0	0	0	1	0	0	0
0	0	0	0	0	0	0	0	0	1	0	0	1	1	0	0	0	0
1	1	0	1	1	1	1	0	0	0	0	0	0	0	1	0	1	1
0	0	0	0	0	0	0	0	1	0	0	0	1	1	0	0	0	0
0	0	0	0	0	0	0	0	0	0	0	0	0	0	0	1	1	0
0	0	0	0	0	0	0	0	0	1	0	0	0	0	0	0	0	0
0	1	1	0	1	1	1	0	0	0	0	0	1	1	1	1	1	0
0	1	1	0	0	0	1	0	0	0	0	0	0	0	0	0	0	0
0	0	0	0	1	0	0	0	1	0	0	0	0	0	1	0	1	1
0	0	0	1	0	1	0	0	0	1	0	0	1	0	0	0	0	0
1	0	1	0	1	0	0	0	0	0	0	0	0	1	0	1	1	0
1	1	0	1	1	1	1	1	1	1	1	1	1	1	1	1	1	1
0	0	0	0	0	0	0	0	0	0	0	0	0	1	0	0	0	0
0	0	1	1	1	0	1	0	0	0	0	0	0	0	0	0	0	0
0	0	0	0	1	0	1	0	1	0	0	0	1	1	0	0	0	0
0	1	0	0	0	1	0	0	0	1	0	0	0	0	0	1	1	0
1	0	0	0	0	0	0	0	0	0	0	0	1	1	1	0	0	1
0	0	0	0	0	0	1	0	0	0	0	0	0	0	0	0	0	0
0	0	0	0	0	1	0	0	0	0	0	0	0	0	0	0	0	0
0	0	0	0	0	0	0	0	0	0	0	0	0	0	0	0	0	1
0	0	0	0	0	0	0	0	0	0	0	1	0	0	0	0	0	0
0	0	0	1	0	0	0	0	0	0	0	0	0	0	0	0	0	0
0	0	0	0	0	1	1	0	0	0	0	0	0	0	0	0	0	0
1	0	0	0	0	0	0	0	0	0	0	0	0	0	0	0	0	0
0	0	0	0	0	1	0	0	0	0	0	0	0	0	0	0	0	0
0	1	0	0	0	0	0	0	0	0	0	0	0	0	0	0	0	0
0	0	0	0	0	0	0	0	0	0	1	0	0	0	0	0	0	0
0	0	0	1	0	0	0	0	0	0	0	0	0	0	0	0	0	0
0	0	0	0	0	0	0	0	0	0	0	0	0	0	0	0	0	1
0	0	0	0	0	0	1	0	1	0	0	0	1	1	1	1	0	0
0	0	0	0	0	1	0	0	1	0	0	1	0	0	0	0	0	0
1	1	1	0	1	0	1	0	0	0	0	0	0	0	0	0	0	0
0	1	0	0	1	1	0	0	0	0	0	0	0	0	0	0	0	0
0	0	0	0	0	0	0	1	0	0	0	0	0	0	0	0	0	0
0	0	0	1	0	0	0	0	0	0	0	0	0	0	0	0	0	0
0	0	0	0	0	0	0	0	0	0	0	1	0	0	0	0	0	0
0	0	0	0	0	1	1	0	0	0	0	1	0	0	0	0	0	0
0	0	1	0	0	0	0	0	1	1	0	0	1	0	1	1	1	0
1	0	0	0	1	1	1	0	0	0	0	0	0	0	0	0	0	0
0	0	1	1	0	0	0	0	0	0	0	0	0	0	0	0	0	1
1	1	1	1	1	1	1	1	1	1	1	0	1	1	1	1	1	1
0	0	0	0	0	0	0	0	0	0	0	1	0	0	0	0	0	0
1	1	0	0	0	1	1	1	1	1	1	0	1	1	1	1	1	1
0	0	0	0	1	1	0	0	0	0	0	1	1	1	1	1	1	1
1	0	0	1	0	1	1	1	0	1	0	0	0	0	0	0	0	0
1	1	1	0	0	0	0	0	1	1	1	1	1	1	1	1	1	1
0	0	0	1	1	1	1	1	0	0	0	0	0	0	0	0	0	0
1	0	1	1	1	0	1	0	1	0	0	1	0	1	0	0	0	1
0	0	0	0	0	0	0	0	0	0	0	1	0	0	0	0	0	0
0	0	1	0	0	1	0	0	0	0	0	0	0	0	0	0	0	0
1	1	0	1	1	1	1	1	1	1	1	1	1	1	1	1	1	1
0	0	1	0	0	0	0	0	0	0	0	0	0	0	0	0	0	0
0	0	0	0	0	0	0	1	0	0	0	0	0	0	0	0	0	0
0	0	0	0	0	0	0	0	0	0	0	1	0	0	0	0	0	0
0	0	0	0	0	0	0	0	0	0	0	1	0	0	0	0	0	0
0	0	0	1	0	0	0	0	0	0	1	1	0	0	0	0	0	1
0	0	0	0	1	0	0	0	0	0	0	0	0	0	0	0	0	0
0	0	0	0	0	0	0	1	0	0	0	0	0	0	0	0	0	0
0	0	1	1	0	0	0	0	0	0	1	1	0	0	0	0	0	1
0	0	0	0	0	0	0	1	0	0	0	0	0	0	0	0	0	0
0	0	0	0	0	0	0	0	0	0	0	1	0	0	0	0	0	1
1	1	0	0	0	1	1	0	1	1	0	0	1	1	1	1	1	0
0	0	1	1	0	0	0	0	0	0	0	0	0	0	0	0	0	0
0	0	0	0	0	0	0	0	0	0	1	1	0	0	0	0	0	1
0	0	0	0	0	0	0	0	0	0	0	0	0	0	0	0	0	1
0	1	1	1	1	0	0	1	0	0	0	0	0	0	1	0	1	0
0	0	0	0	0	0	0	1	0	1	0	1	1	0	0	0	0	0
0	0	0	1	0	1	0	0	0	0	0	0	0	0	0	0	0	0
0	1	0	0	0	1	1	0	0	0	0	0	0	0	0	0	0	0
1	0	1	0	0	0	0	1	1	0	0	0	0	1	1	1	1	0
0	0	0	0	0	0	0	0	0	1	1	1	1	0	0	0	0	0
0	0	0	1	0	0	0	0	0	0	0	0	0	0	0	0	0	0
1	0	0	0	0	0	0	0	0	0	0	0	0	1	0	0	0	0
0	0	0	1	0	1	1	1	0	0	0	1	0	0	0	0	1	0
0	1	1	0	0	0	0	0	1	0	1	0	1	0	1	0	1	0
0	0	0	0	0	0	0	0	0	1	0	0	0	0	0	0	0	0
0	1	0	1	0	1	1	0	0	0	0	0	0	0	0	0	0	1
0	0	0	0	1	0	0	0	1	1	1	1	1	0	1	1	1	1
1	0	1	0	0	0	0	0	0	0	0	0	0	0	0	0	0	0
0	0	0	0	0	0	0	1	0	0	0	0	0	1	0	0	0	0
0	1	0	0	1	1	1	0	0	0	0	0	1	0	0	1	0	0
1	0	0	1	0	0	0	0	1	1	0	0	1	1	1	0	1	1
1	1	0	0	1	1	1	1	1	1	0	1	0	0	0	1	0	1
0	0	0	0	0	0	0	0	0	0	0	0	1	1	1	0	1	0
1	1	1	0	0	1	0	0	1	0	0	0	1	0	1	1	1	0
0	0	0	1	1	0	0	0	0	1	0	0	0	0	0	0	0	0
0	0	0	0	0	1	1	0	1	0	0	1	0	0	0	1	0	0
1	1	1	0	0	0	0	0	0	0	0	0	1	0	1	0	1	0
0	0	0	0	0	0	1	1	1	1	0	0	0	1	0	0	0	1
0	0	1	0	0	0	0	0	0	0	1	1	0	0	0	0	0	1
0	1	0	0	1	1	1	1	1	0	0	0	0	0	0	0	0	0
0	0	0	1	0	0	0	1	1	1	0	0	1	1	1	0	1	0
0	0	0	0	0	1	0	0	0	1	1	1	0	0	0	0	0	0
0	0	0	0	1	0	1	0	1	0	0	0	1	0	1	1	0	1
0	0	0	0	0	0	0	0	0	0	0	0	0	0	0	0	0	1
0	0	0	0	0	1	0	0	0	0	0	0	0	0	0	0	0	1
0	0	0	0	0	0	0	0	0	0	0	0	0	0	0	1	0	0
0	0	0	0	0	0	0	0	0	0	0	0	0	0	0	1	0	0
0	0	0	0	0	0	0	0	0	0	0	0	0	0	0	1	1	0
0	0	0	1	0	0	0	0	0	0	1	1	0	0	0	0	0	0
0	0	0	0	0	0	0	1	0	0	0	0	0	0	0	0	0	0
0	0	0	0	1	0	0	0	0	0	0	0	0	0	0	0	0	0
0	0	0	0	0	0	0	1	0	0	0	0	0	0	0	0	0	0
0	0	0	0	0	0	0	0	0	0	0	0	0	0	0	0	0	1
0	0	0	0	0	0	0	0	0	0	0	0	0	0	0	0	1	0
0	0	0	1	0	0	0	0	0	0	1	1	0	1	0	0	0	0
0	0	0	0	0	0	0	0	0	0	0	0	0	0	0	1	0	0
0	0	0	0	0	0	0	0	0	0	0	0	1	0	1	1	0	0
1	0	0	0	0	0	0	0	0	0	0	0	0	0	0	0	1	0
1	1	0	0	1	1	1	0	1	0	0	0	1	1	1	1	1	1
0	0	0	0	0	0	0	0	0	1	0	1	0	0	0	0	0	0
0	0	0	0	0	0	0	1	0	0	1	0	0	0	0	0	0	0
0	0	0	0	0	1	0	0	0	0	0	0	0	0	0	0	0	0
1	0	1	0	0	0	0	0	0	0	0	0	0	0	0	0	0	0
0	0	0	1	0	0	0	0	0	0	0	0	1	0	0	0	1	0
0	0	0	0	0	1	0	0	0	0	1	1	0	1	0	0	0	0
0	1	0	0	0	0	0	0	0	0	0	0	1	0	1	1	1	1
1	1	0	0	1	0	1	0	1	1	0	0	0	0	0	1	0	0
0	0	0	0	0	0	0	0	0	0	0	0	0	1	0	0	0	0
0	0	1	0	0	0	0	0	0	0	0	0	0	0	0	0	0	0
0	0	1	0	0	0	0	0	0	0	0	0	0	0	0	0	0	0
1	1	0	0	1	1	1	0	1	1	0	0	1	1	0	1	1	0
0	0	0	0	0	0	0	0	0	0	0	0	1	0	1	0	0	1
0	0	0	0	0	1	0	0	0	0	0	0	0	0	0	0	0	0
0	0	1	1	1	0	1	1	0	1	1	0	1	0	1	1	1	0
0	1	0	0	0	1	0	0	0	0	0	0	0	0	0	0	0	0
1	0	1	0	0	0	0	0	0	0	0	0	0	0	0	0	0	1
0	1	0	1	1	0	1	1	1	1	1	0	1	1	1	1	1	0
1	0	1	0	0	1	0	0	0	1	0	0	0	0	0	1	1	1
0	0	0	0	1	0	0	0	0	0	0	0	0	0	0	0	0	0
1	0	0	1	0	1	1	0	1	0	0	0	0	0	0	0	0	1
0	1	1	0	0	0	0	1	0	1	1	0	0	1	1	1	0	0
0	0	0	1	0	0	0	1	0	0	0	1	0	0	1	0	0	0
0	0	0	0	1	1	1	0	1	0	0	0	0	0	0	0	0	0
0	1	0	0	0	0	0	1	0	1	0	0	1	1	1	1	1	1
0	0	0	0	0	0	0	0	0	1	0	0	0	0	0	0	0	0
0	0	0	0	0	1	0	0	0	0	0	0	0	0	0	0	1	0
0	0	1	0	0	0	0	0	0	0	0	0	0	0	0	0	0	1
0	0	0	1	0	0	0	0	0	0	0	0	0	0	0	0	0	0
0	0	0	0	0	0	0	1	0	0	0	0	0	0	0	0	0	0
0	0	0	0	0	0	0	1	0	0	0	0	0	0	0	0	0	0
0	0	0	0	0	0	0	0	0	0	0	1	0	0	0	0	0	0
0	0	0	0	0	0	0	0	0	0	1	0	0	0	0	0	0	0
0	0	0	0	0	0	0	1	0	0	0	0	0	0	0	0	0	0
0	0	0	0	1	0	0	0	0	0	0	1	0	0	0	0	0	0
0	0	0	1	1	0	0	0	0	0	0	0	0	0	0	0	0	0
0	0	0	0	0	0	0	0	0	0	1	0	0	0	0	0	0	0
0	1	0	0	0	0	1	1	0	0	0	1	1	0	0	0	0	0
0	0	1	0	0	0	0	0	1	0	0	1	0	0	0	0	0	0
0	0	0	0	0	1	0	0	0	0	0	0	0	0	0	0	0	0
0	0	0	0	0	0	0	1	0	0	1	0	0	0	0	0	0	0
1	1	0	0	1	1	1	1	1	0	0	1	0	1	1	1	1	1
0	0	1	0	0	0	0	0	0	0	0	0	1	0	0	0	0	0
1	1	0	1	1	0	1	0	1	1	0	0	0	1	1	1	1	1
0	0	0	0	0	1	0	0	0	0	0	0	1	0	0	0	0	0
0	0	1	0	0	0	0	1	0	0	0	0	0	0	0	0	0	0
0	1	0	0	1	0	1	0	1	0	1	1	0	0	0	1	1	1
0	0	1	0	0	1	0	1	0	0	0	0	1	1	1	0	0	0
0	0	0	0	0	1	0	0	0	0	0	0	0	0	0	0	0	0
1	1	0	0	0	0	1	0	1	1	1	1	0	0	0	0	0	1
0	0	0	0	1	0	0	0	0	0	0	0	0	0	0	0	1	0
0	0	0	0	0	0	0	1	0	0	0	0	0	0	0	0	0	0
0	0	0	0	0	0	0	0	0	0	1	1	0	0	0	0	0	0
1	1	1	0	1	1	1	0	1	1	0	0	1	1	1	1	1	1
0	0	0	0	0	0	0	0	0	1	0	0	0	0	0	0	0	0

## Sheet: Si (ISSR)
	pom06 175	zap00 240	lbs05 170	lbs05 628	dos01 333	dos01 405	dos01 468	bes03 373	bes03 379	bes03 354	ora03 178	bie04 189	pod02 215	pod02 172	pod02 317	'Alicia'	'Limousine'	'Eska 46'
pom06 175	1	0.43103	0.304	0.25455	0.32479	0.40329	0.375	0.3682	0.32618	0.34632	0.38136	0.3038	0.32389	0.39357	0.33333	0.33977	0.34783	0.35616
zap00 240	0.43103	1	0.24138	0.23762	0.36111	0.39111	0.41441	0.37104	0.37209	0.39437	0.37615	0.27397	0.30568	0.329	0.36937	0.34855	0.3234	0.34826
lbs05 170	0.304	0.24138	1	0.22727	0.2906	0.28807	0.33333	0.30962	0.32618	0.29437	0.26271	0.3038	0.21862	0.28112	0.24167	0.26255	0.29249	0.21918
lbs05 628	0.25455	0.23762	0.22727	1	0.30392	0.32864	0.32381	0.31579	0.28571	0.30846	0.3301	0.28986	0.30415	0.22831	0.27619	0.21834	0.24215	0.26455
dos01 333	0.32479	0.36111	0.2906	0.30392	1	0.38767	0.51786	0.4843	0.57143	0.47442	0.45455	0.31674	0.38095	0.39485	0.42857	0.41975	0.28692	0.37438
dos01 405	0.40329	0.39111	0.28807	0.32864	0.38767	1	0.45494	0.37931	0.38938	0.39286	0.38428	0.33913	0.34167	0.39669	0.3691	0.35714	0.29268	0.30189
dos01 468	0.375	0.41441	0.33333	0.32381	0.51786	0.45494	1	0.54148	0.57399	0.49774	0.53982	0.38767	0.43882	0.46862	0.42609	0.41767	0.39506	0.38278
bes03 373	0.3682	0.37104	0.30962	0.31579	0.4843	0.37931	0.54148	1	0.59459	0.46364	0.52444	0.37168	0.36441	0.39496	0.40175	0.32258	0.30579	0.42308
bes03 379	0.32618	0.37209	0.32618	0.28571	0.57143	0.38938	0.57399	0.59459	1	0.50467	0.52055	0.35455	0.38261	0.40517	0.37668	0.34711	0.29661	0.35644
bes03 354	0.34632	0.39437	0.29437	0.30846	0.47442	0.39286	0.49774	0.46364	0.50467	1	0.50691	0.36697	0.40351	0.37391	0.42534	0.375	0.36752	0.37
ora03 178	0.38136	0.37615	0.26271	0.3301	0.45455	0.38428	0.53982	0.52444	0.52055	0.50691	1	0.36771	0.40343	0.4	0.42478	0.34286	0.3682	0.35122
bie04 189	0.3038	0.27397	0.3038	0.28986	0.31674	0.33913	0.38767	0.37168	0.35455	0.36697	0.36771	1	0.30769	0.35593	0.27313	0.25203	0.30833	0.31068
pod02 215	0.32389	0.30568	0.21862	0.30415	0.38095	0.34167	0.43882	0.36441	0.38261	0.40351	0.40343	0.30769	1	0.39837	0.64979	0.42188	0.36	0.40741
pod02 172	0.39357	0.329	0.28112	0.22831	0.39485	0.39669	0.46862	0.39496	0.40517	0.37391	0.4	0.35593	0.39837	1	0.45188	0.44961	0.39683	0.36697
pod02 317	0.33333	0.36937	0.24167	0.27619	0.42857	0.3691	0.42609	0.40175	0.37668	0.42534	0.42478	0.27313	0.64979	0.45188	1	0.44177	0.3786	0.40191
'Alicia'	0.33977	0.34855	0.26255	0.21834	0.41975	0.35714	0.41767	0.32258	0.34711	0.375	0.34286	0.25203	0.42188	0.44961	0.44177	1	0.43511	0.34211
'Limousine'	0.34783	0.3234	0.29249	0.24215	0.28692	0.29268	0.39506	0.30579	0.29661	0.36752	0.3682	0.30833	0.36	0.39683	0.3786	0.43511	1	0.34234
'Eska 46'	0.35616	0.34826	0.21918	0.26455	0.37438	0.30189	0.38278	0.42308	0.35644	0.37	0.35122	0.31068	0.40741	0.36697	0.40191	0.34211	0.34234	1

## Sheet: Si (RAPD)
	pom06 175	zap00 240	lbs05 170	lbs05 628	dos01 333	dos01 405	dos01 468	bes03 373	bes03 379	bes03 354	ora03 178	bie04 189	pod02 215	pod02 172	pod02 317	'Alicia'	'Limousine'	'Eska 46'
pom06 175		0.54054	0.38	0.28571	0.39252	0.40336	0.5	0.2037	0.45714	0.38095	0.19565	0.2037	0.38596	0.44444	0.41818	0.39286	0.43636	0.45714
zap00 240	0.54054		0.37383	0.21429	0.50877	0.49206	0.60504	0.29565	0.48214	0.48214	0.30303	0.22609	0.47934	0.45217	0.51282	0.5042	0.47863	0.35714
lbs05 170	0.38	0.37383		0.21782	0.27184	0.24348	0.25926	0.19231	0.25743	0.23762	0.27273	0.15385	0.32727	0.26923	0.35849	0.2963	0.33962	0.25743
lbs05 628	0.28571	0.21429	0.21782		0.2963	0.21667	0.35398	0.27523	0.26415	0.28302	0.25806	0.27523	0.29565	0.27523	0.30631	0.23009	0.32432	0.30189
dos01 333	0.39252	0.50877	0.27184	0.2963		0.42623	0.57391	0.27027	0.46296	0.40741	0.25263	0.25225	0.41026	0.41441	0.49558	0.48696	0.47788	0.35185
dos01 405	0.40336	0.49206	0.24348	0.21667	0.42623		0.53543	0.26016	0.38333	0.4	0.2243	0.26016	0.35659	0.30894	0.32	0.3937	0.384	0.3
dos01 468	0.5	0.60504	0.25926	0.35398	0.57391	0.53543		0.36207	0.58407	0.46018	0.3	0.25862	0.40984	0.43103	0.38983	0.48333	0.37288	0.37168
bes03 373	0.2037	0.29565	0.19231	0.27523	0.27027	0.26016	0.36207		0.33028	0.34862	0.29167	0.25	0.28814	0.32143	0.33333	0.31034	0.29825	0.20183
bes03 379	0.45714	0.48214	0.25743	0.26415	0.46296	0.38333	0.58407	0.33028		0.4717	0.32258	0.29358	0.45217	0.45872	0.48649	0.54867	0.48649	0.45283
bes03 354	0.38095	0.48214	0.23762	0.28302	0.40741	0.4	0.46018	0.34862	0.4717		0.43011	0.27523	0.50435	0.45872	0.45045	0.47788	0.43243	0.32075
ora03 178	0.19565	0.30303	0.27273	0.25806	0.25263	0.2243	0.3	0.29167	0.32258	0.43011		0.4375	0.2549	0.27083	0.28571	0.28	0.2449	0.34409
bie04 189	0.2037	0.22609	0.15385	0.27523	0.25225	0.26016	0.25862	0.25	0.29358	0.27523	0.4375		0.22034	0.25	0.24561	0.25862	0.21053	0.34862
pod02 215	0.38596	0.47934	0.32727	0.29565	0.41026	0.35659	0.40984	0.28814	0.45217	0.50435	0.2549	0.22034		0.57627	0.73333	0.54098	0.56667	0.31304
pod02 172	0.44444	0.45217	0.26923	0.27523	0.41441	0.30894	0.43103	0.32143	0.45872	0.45872	0.27083	0.25	0.57627		0.64912	0.53448	0.52632	0.34862
pod02 317	0.41818	0.51282	0.35849	0.30631	0.49558	0.32	0.38983	0.33333	0.48649	0.45045	0.28571	0.24561	0.73333	0.64912		0.59322	0.63793	0.43243
'Alicia'	0.39286	0.5042	0.2963	0.23009	0.48696	0.3937	0.48333	0.31034	0.54867	0.47788	0.28	0.25862	0.54098	0.53448	0.59322		0.67797	0.35398
'Limousine'	0.43636	0.47863	0.33962	0.32432	0.47788	0.384	0.37288	0.29825	0.48649	0.43243	0.2449	0.21053	0.56667	0.52632	0.63793	0.67797		0.3964
'Eska 46'	0.45714	0.35714	0.25743	0.30189	0.35185	0.3	0.37168	0.20183	0.45283	0.32075	0.34409	0.34862	0.31304	0.34862	0.43243	0.35398	0.3964

## Sheet: Si (RAPD+ISSR)
		pom06 175	zap00 240	lbs05 170	lbs05 628	dos01 333	dos01 405	dos01 468	bes03 373	bes03 379	bes03 354	ora03 178	bie04 189	pod02 215	pod02 172	pod02 317	'Alicia'	'Limousine'	'Eska 46'
	pom06 175		0.46647	0.32571	0.26462	0.34604	0.40331	0.41477	0.317	0.36686	0.35714	0.32927	0.27246	0.34349	0.40896	0.36	0.3558	0.37466	0.38889
	zap00 240	0.46647		0.28319	0.2293	0.41212	0.42735	0.48094	0.34524	0.40979	0.42462	0.35331	0.25749	0.36571	0.36994	0.41888	0.4	0.375	0.35144
	lbs05 170	0.32571	0.28319		0.2243	0.28487	0.27374	0.31034	0.27405	0.30539	0.27711	0.26543	0.25806	0.2521	0.27762	0.27746	0.27248	0.30641	0.23125
	lbs05 628	0.26462	0.2293	0.2243		0.30128	0.28829	0.33437	0.30189	0.27832	0.29967	0.30769	0.28481	0.3012	0.2439	0.2866	0.22222	0.26946	0.27797
	dos01 333	0.34604	0.41212	0.28487	0.30128		0.40115	0.53687	0.41317	0.53538	0.45201	0.39365	0.29518	0.3908	0.40116	0.45104	0.44134	0.34857	0.36656
	dos01 405	0.40331	0.42735	0.27374	0.28829	0.40115		0.48333	0.33803	0.38728	0.39535	0.33333	0.31161	0.34688	0.36712	0.35196	0.36939	0.32345	0.3012
	dos01 468	0.41477	0.48094	0.31034	0.33437	0.53687	0.48333		0.48116	0.57738	0.48503	0.46626	0.34402	0.42897	0.45634	0.41379	0.43902	0.38781	0.37888
	bes03 373	0.317	0.34524	0.27405	0.30189	0.41317	0.33803	0.48116		0.50755	0.42553	0.45483	0.33136	0.33898	0.37143	0.37901	0.31868	0.30337	0.347
	bes03 379	0.36686	0.40979	0.30539	0.27832	0.53538	0.38728	0.57738	0.50755		0.49375	0.46154	0.33435	0.4058	0.42229	0.41317	0.41127	0.35735	0.38961
	bes03 354	0.35714	0.42462	0.27711	0.29967	0.45201	0.39535	0.48503	0.42553	0.49375		0.48387	0.33639	0.43732	0.40118	0.43373	0.40793	0.38841	0.35294
	ora03 178	0.32927	0.35331	0.26543	0.30769	0.39365	0.33333	0.46626	0.45483	0.46154	0.48387		0.38871	0.35821	0.36254	0.38272	0.32464	0.33234	0.34899
	bie04 189	0.27246	0.25749	0.25806	0.28481	0.29518	0.31161	0.34402	0.33136	0.33435	0.33639	0.38871		0.27841	0.32184	0.26393	0.25414	0.27684	0.32381
	pod02 215	0.34349	0.36571	0.2521	0.3012	0.3908	0.34688	0.42897	0.33898	0.4058	0.43732	0.35821	0.27841		0.45604	0.67787	0.46032	0.42703	0.37462
	pod02 172	0.40896	0.36994	0.27762	0.2439	0.40116	0.36712	0.45634	0.37143	0.42229	0.40118	0.36254	0.32184	0.45604		0.51558	0.47594	0.43716	0.36086
	pod02 317	0.36	0.41888	0.27746	0.2866	0.45104	0.35196	0.41379	0.37901	0.41317	0.43373	0.38272	0.26393	0.67787	0.51558		0.49046	0.4624	0.4125
	'Alicia'	0.3558	0.4	0.27248	0.22222	0.44134	0.36939	0.43902	0.31868	0.41127	0.40793	0.32464	0.25414	0.46032	0.47594	0.49046		0.51053	0.34604
	'Limousine'	0.37466	0.375	0.30641	0.26946	0.34857	0.32345	0.38781	0.30337	0.35735	0.38841	0.33234	0.27684	0.42703	0.43716	0.4624	0.51053		0.36036
	'Eska 46'	0.38889	0.35144	0.23125	0.27797	0.36656	0.3012	0.37888	0.347	0.38961	0.35294	0.34899	0.32381	0.37462	0.36086	0.4125	0.34604	0.36036	0.347819

## Sheet: PCA (ISSR)
Forms	Numbers	Bp	Products														Method	Primer
pom06 175	1	1372	1326	1233	1129	1019	976										ISSR	N001
zap00 240	2	1363	1189	1111	983	853	768
lbs05 170	3	1734	1621	1415	1302	1205	1153
lbs05 628	4	1602	1427	1294	1226	1044	928
dos01 333	5	1397	1261	1143	997	865	802
dos01 405	6	1368	1246	1114	1000	863	817
dos01 468	7	1399	1128	1018	865	782	591
bes03 373	8	1601	1404	1298	1115	1041	859
bes03 379	9	1615	1395	1240	1119	1004	866
bes03 354	10	1372	1179	1090	1017	859	730
ora03 178	11	1585	1285	1041	981	853	692
bie04 189	12	2256	1625	1296	1216	1060	984
pod02 215	13	1547	1393	1346	1269	1106	1027
pod02 172	14	1603	1370	1120	1000	839	686
pod02 317	15	1559	1389	1335	1163	1096	1018
'Alicia'	16	2055	1873	1777	1524	1366	1250
'Limousine'	17	2255	2017	1784	1587	1344	1171
'Eska 46'	18	1096	978	798	656	583	502
pom06 175	1	2422	1804	1281	1087	929											ISSR	808
zap00 240	2	2456	1281	1043	916	731
lbs05 170	3	1563	1140	1065	916	782
lbs05 628	4	1907	1450	941	641	595
dos01 333	5	1290	1043	891	641	571
dos01 405	6	2375	1756	1299	885	659
dos01 468	7	1372	1272	1043	891	750
bes03 373	8	3105	1806	1391	1308	1057
bes03 379	9	1290	1043	878	782	632
bes03 354	10	1299	1072	890	809	632
ora03 178	11	1401	1043	878	627	562
bie04 189	12	2921	2690	1769	1255	1079
pod02 215	13	2361	1806	1401	1281	1204
pod02 172	14	2362	1337	1264	1079	896
pod02 317	15	2362	1807	1410	1290	1174
'Alicia'	16	1807	1450	1238	1101	908
'Limousine'	17	2446	1281	1079	927	797
'Eska 46'	18	1139	940	859	699	626
pom06 175	1	878	764	664	597	529	470										ISSR	TGA
zap00 240	2	1373	1234	872	772	700	548
lbs05 170	3	1964	1201	1153	827	737	681
lbs05 628	4	1569	1224	1034	870	538	400
dos01 333	5	2121	1717	1539	1355	920	869
dos01 405	6	2168	1485	12030	914	873	758
dos01 468	7	1373	908	843	750	690	633
bes03 373	8	1174	1008	881	729	690	596
bes03 379	9	1392	1335	1184	1051	984	754
bes03 354	10	1551	1390	1183	1140	983	880
ora03 178	11	1579	1396	1225	1008	859	757
bie04 189	12	1539	1447	1276	1034	990	863
pod02 215	13	1732	1567	1393	1171	931	761
pod02 172	14	1926	1414	910	761	555	530
pod02 317	15	1574	1398	1167	929	889	761
'Alicia'	16	1603	1418	1367	932	757	699
'Limousine'	17	2209	1581	1395	1145	987	931
'Eska 46'	18	1423	1181	1119	809	756	636
pom06 175	1	1762	1643	1383	1291	1112	1057										ISSR	M9
zap00 240	2	1725	1543	1358	986	878	749
lbs05 170	3	1586	1324	1071	879	818	682
lbs05 628	4	1409	1349	1106	897	802	707
dos01 333	5	1366	1007	874	808	761	607
dos01 405	6	1794	1367	1292	1106	1001	809
dos01 468	7	1736	1542	1350	1185	1059	887
bes03 373	8	1772	1630	1392	1325	995	876
bes03 379	9	1350	1178	989	911	871	805
bes03 354	10	1699	1342	1246	1101	866	754
ora03 178	11	1342	1285	1121	1028	866	796
bie04 189	12	1675	1500	991	770	562	476
pod02 215	13	2082	4698	1531	1359	1136	1016
pod02 172	14	1722	1521	1334	1278	1150	1036
pod02 317	15	1563	1384	1023	880	830	777
'Alicia'	16	2110	1806	1721	1531	1351	1158								413
'Limousine'	17	1882	1596	1318	1224	1123	1030
'Eska 46'	18	1385	1318	1024	969	894	837
pom06 175	1	1769	1651	1418	1265	1135											ISSR	ISSR 7
zap00 240	2	2327	2187	1958	1696	1520
lbs05 170	3	2183	1368	1182	1126	916
lbs05 628	4	1506	1301	1112	1020	833
dos01 333	5	1639	1547	1401	1285	1172
dos01 405	6	1684	1617	1269	1079	1028
dos01 468	7	1833	1615	1389	1254	1169
bes03 373	8	1649	1548	1417	1150	1111
bes03 379	9	1572	1415	1270	1184	991
bes03 354	10	1634	1397	1268	1163	1085
ora03 178	11	1650	1549	1259	1168	1101
bie04 189	12	2094	1356	1076	907	820
pod02 215	13	2283	1965	1824	1625	1376
pod02 172	14	2250	1950	1718	1613	1457
pod02 317	15	1610	1378	1142	984	808
'Alicia'	16	2104	1932	1607	1376	1277
'Limousine'	17	2140	1939	1623	1514	1367
'Eska 46'	18	1379	1072	964	861	810
pom06 175	1	1802	1198	1080	1003	950	915										ISSR	811
zap00 240	2	1251	918	704	616	591	397
lbs05 170	3	1386	1206	1110	1022	959	871
lbs05 628	4	1761	1407	1054	1000	885	766
dos01 333	5	1633	1264	1084	700	621	525
dos01 405	6	1839	1704	1257	1095	922	791
dos01 468	7	1850	1615	1355	1259	1069	925
bes03 373	8	1631	1264	1080	925	799	697
bes03 379	9	1629	1371	1264	1091	940	812
bes03 354	10	1848	1272	1104	987	811	704
ora03 178	11	1876	1647	1364	1271	1092	929
bie04 189	12	1778	1359	1279	1078	880	712
pod02 215	13	2749	2245	1835	1620	1457	1324
pod02 172	14	1804	1645	1363	1271	1105	932
pod02 317	15	2767	1865	1628	1325	1260	1090
'Alicia'	16	2728	1853	1600	1216	1069	968
'Limousine'	17	1785	1400	1293	1230	1076	1039
'Eska 46'	18	1254	1086	839	697	614	407
pom06 175	1	1906	1602	1377	996	841	723										ISSR	810
zap00 240	2	1362	1172	1012	898	821	705
lbs05 170	3	1379	1178	1098	961	913	811
lbs05 628	4	2523	1384	833	744	622	481
dos01 333	5	1904	1574	1445	1146	896	828
dos01 405	6	1518	1376	1269	1176	813	738
dos01 468	7	1375	1195	915	864	690	594
bes03 373	8	1460	1169	914	844	689	597
bes03 379	9	1476	1383	1556	908	838	687
bes03 354	10	1462	1382	913	804	712	563
ora03 178	11	1390	1174	917	827	6889	596
bie04 189	12	1914	1405	1164	911	705	591
pod02 215	13	1877	1475	1160	910	844	690
pod02 172	14	1456	1367	909	829	698	555
pod02 317	15	1865	1443	1134	888	818	683
'Alicia'	16	1563	1427	1265	1146	887	822
'Limousine'	17	1875	1412	881	816	680	541
'Eska 46'	18	1133	880	791	674	570	536
pom06 175	1	2381	1767	1356	1242												ISSR	840
zap00 240	2	2020	1848	1691	1436
lbs05 170	3	1383	1084	895	816
lbs05 628	4	2095	1863	1300	1208
dos01 333	5	1600	1324	1078	898
dos01 405	6	1805	1288	1196	975
dos01 468	7	1105	983	865	784
bes03 373	8	2351	2102	1238	1101
bes03 379	9	1472	1368	1102	990
bes03 354	10	2124	1917	1106	1028
ora03 178	11	2092	1751	1509	1228
bie04 189	12	1383	1248	1072	976
pod02 215	13	2066	1795	1509	1348
pod02 172	14	2580	2140	1744	1475
pod02 317	15	1746	1477	1319	1201
'Alicia'	16	2967	2545	1815	1717
'Limousine'	17	2549	2082	1972	1827
'Eska 46'	18	1796	1398	1254	1153
pom06 175	1	2099	1595	1484	1360												ISSR	834
zap00 240	2	1674	1507	1311	978
lbs05 170	3	1264	1009	969	853
lbs05 628	4	1293	910	840	489
dos01 333	5	1978	1500	1403	1263
dos01 405	6	1657	1463	1316	1097
dos01 468	7	1516	1279	917	792
bes03 373	8	1452	1291	996	791
bes03 379	9	1513	1278	993	913
bes03 354	10	1517	1274	1070	911
ora03 178	11	1500	1278	1229	909
bie04 189	12	2499	1429	1257	913
pod02 215	13	2131	1975	1658	1370
pod02 172	14	1955	1662	1473	1297
pod02 317	15	1974	1667	1369	1076
'Alicia'	16	2686	2106	1649	1462
'Limousine'	17	1653	1474	1244	909
'Eska 46'	18	1437	1388	1080	902
pom06 175	1	1880	1690	1443	1346	1250	1127										ISSR	807
zap00 240	2	1989	1549	1340	1270	1173	922
lbs05 170	3	1905	1494	1157	744	649	542
lbs05 628	4	1966	1402	1303	1107	799	709
dos01 333	5	1631	1403	898	684	597	402
dos01 405	6	1349	1087	841	677	617	568
dos01 468	7	1969	1759	1460	1383	1254	1051
bes03 373	8	1411	900	736	700	596	560
bes03 379	9	1461	1398	890	735	701	601
bes03 354	10	1665	1535	1378	1250	965	902
ora03 178	11	1455	1379	966	892	739	690
bie04 189	12	1186	908	821	695	586	466
pod02 215	13	1731	1380	1152	1024	899	718
pod02 172	14	1405	1178	965	891	800	725
pod02 317	15	1399	1162	1049	907	845	717
'Alicia'	16	1900	1536	1372	1239	950	893
'Limousine'	17	1741	1474	1373	1233	978	899
'Eska 46'	18	1407	1170	910	699	586	481
pom06 175	1	1895	1675	1574	1398	1246											ISSR	857
zap00 240	2	1698	1535	1486	1396	1251
lbs05 170	3	2053	1592	1498	1296	1144
lbs05 628	4	1370	1335	1070	1005	943
dos01 333	5	1732	1396	1006	964	852
dos01 405	6	1689	1581	1372	1166	945
dos01 468	7	2539	1977	1594	1456	1384
bes03 373	8	1825	1403	946	851	772
bes03 379	9	1987	1457	1407	1007	937
bes03 354	10	1875	1447	1384	1054	938
ora03 178	11	1713	1579	1396	1124	953
bie04 189	12	2467	1663	1566	1442	1360
pod02 215	13	2554	2079	1973	1562	1378
pod02 172	14	2333	1988	1833	1559	1440
pod02 317	15	2600	2016	1563	1400	1025
'Alicia'	16	2471	2131	1976	1813	1529
'Limousine'	17	2506	2162	2050	1867	1723
'Eska 46'	18	903	794	661	500	380
pom06 175	1	1867	1712	1601	1273	1158	1107	953									ISSR	888
zap00 240	2	1653	1237	1140	1095	939	820	707
lbs05 170	3	1765	1666	1580	1370	1298	1191	1108
lbs05 628	4	2185	1585	1222	1163	1058	907	806
dos01 333	5	1300	1172	1076	910	812	727	696
dos01 405	6	1689	1542	1240	1134	1064	929	888
dos01 468	7	1532	1313	1168	1053	924	802	698
bes03 373	8	1574	1193	1076	914	804	698	587
bes03 379	9	1541	1191	1074	921	803	718	690
bes03 354	10	1561	1222	1163	1073	912	797	685
ora03 178	11	2414	2144	1566	1299	1231	1141	1076
bie04 189	12	1849	1251	1074	923	787	707	687
pod02 215	13	1531	1313	1244	1158	1068	937	900
pod02 172	14	1951	1807	1706	1305	1141	1081	940
pod02 317	15	1320	1257	1165	1075	934	901	786
'Alicia'	16	1818	1676	1537	1312	1211	1179	1078
'Limousine'	17	1832	1587	1358	1270	1101	975	819
'Eska 46'	18	1200	1186	1119	973	829	700	589
pom06 175	1	2063	1378	1143	1026	971	835	776									ISSR	841
zap00 240	2	2105	1383	1292	987	791	699	642
lbs05 170	3	2061	1651	1388	1171	1063	868	707
lbs05 628	4	1317	1247	1018	826	753	619	477
dos01 333	5	1379	1289	1024	942	857	803	707
dos01 405	6	2280	2062	1717	1479	1328	1288	1095
dos01 468	7	1376	1300	1171	995	948	839	714
bes03 373	8	1361	1227	1011	972	832	780	701
bes03 379	9	1405	1298	1055	969	867	793	700
bes03 354	10	1372	997	956	799	690	632	498
ora03 178	11	2266	2072	1815	1370	1260	1208	925
bie04 189	12	1690	1296	1248	1008	966	837	778
pod02 215	13	2109	1312	1127	897	823	723	638
pod02 172	14	1962	1417	1366	1299	1196	1023	977
pod02 317	15	2119	1352	1153	921	900	727	641
'Alicia'	16	2504	2083	1493	1388	1321	1206	997
'Limousine'	17	2089	1950	1726	1627	1431	1212	1078
'Eska 46'	18	1430	1195	1007	814	736	645	493
